# Supplementary material for: Aromatic Amines in Organic Synthesis. Part II. p-Aminocinnamaldehydes
Source: MDPI journal article supplement (doi:10.3390/molecules26144360), 2021-07-19

## SUPPORTING INFORMATION

### **Aromatic Amines in Organic Synthesis. Part II. *p*-Aminocinnamaldehydes.**

*Marek Pietrzak\* and Beata Jędrzejewska*

*Faculty of Chemical Technology and Engineering, UTP University of Sciences and Technology,  
Seminarnyja 3, 85-326 Bydgoszcz, Poland*

|                                                             | page           |
|-------------------------------------------------------------|----------------|
| Electronic absorption spectra in methanol and ethyl acetate | <b>S2</b>      |
| Fluorescence spectra in methanol and ethyl acetate          | <b>S3</b>      |
| <sup>1</sup> H and <sup>13</sup> C NMR spectra              | <b>S4-S13</b>  |
| IR spectra                                                  | <b>S14-S23</b> |

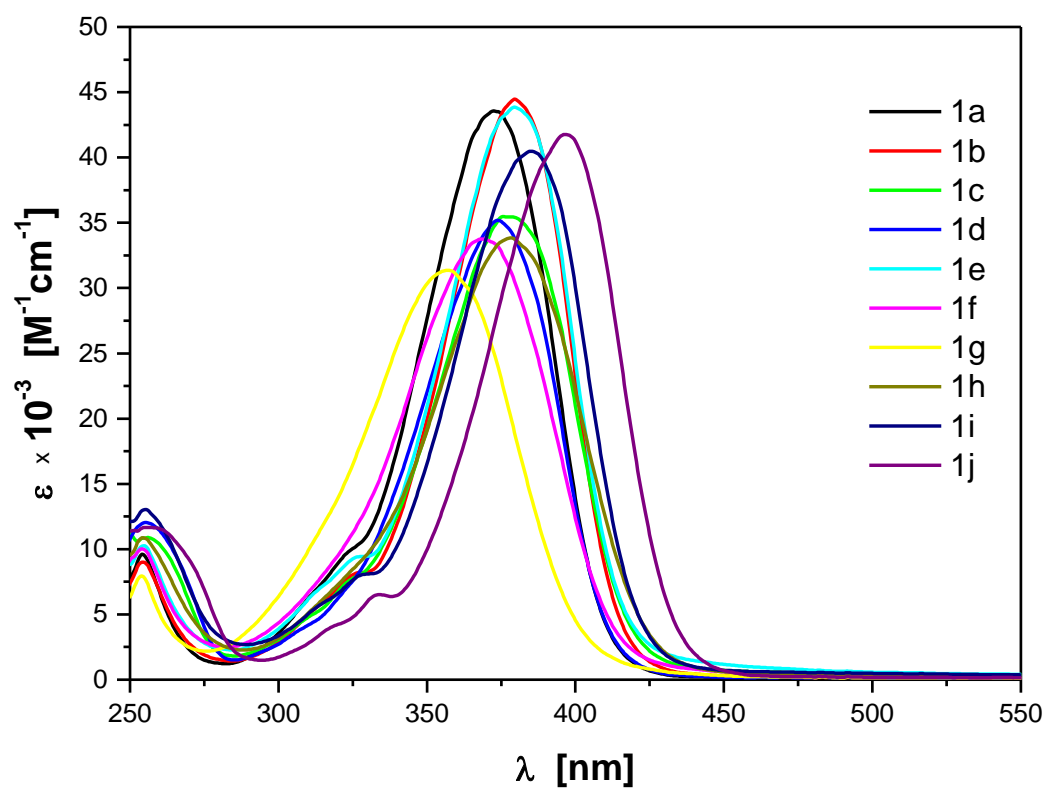

Fig. S1. Electronic absorption spectra of tested *p*-aminocinnamaldehydes in ethyl acetate.

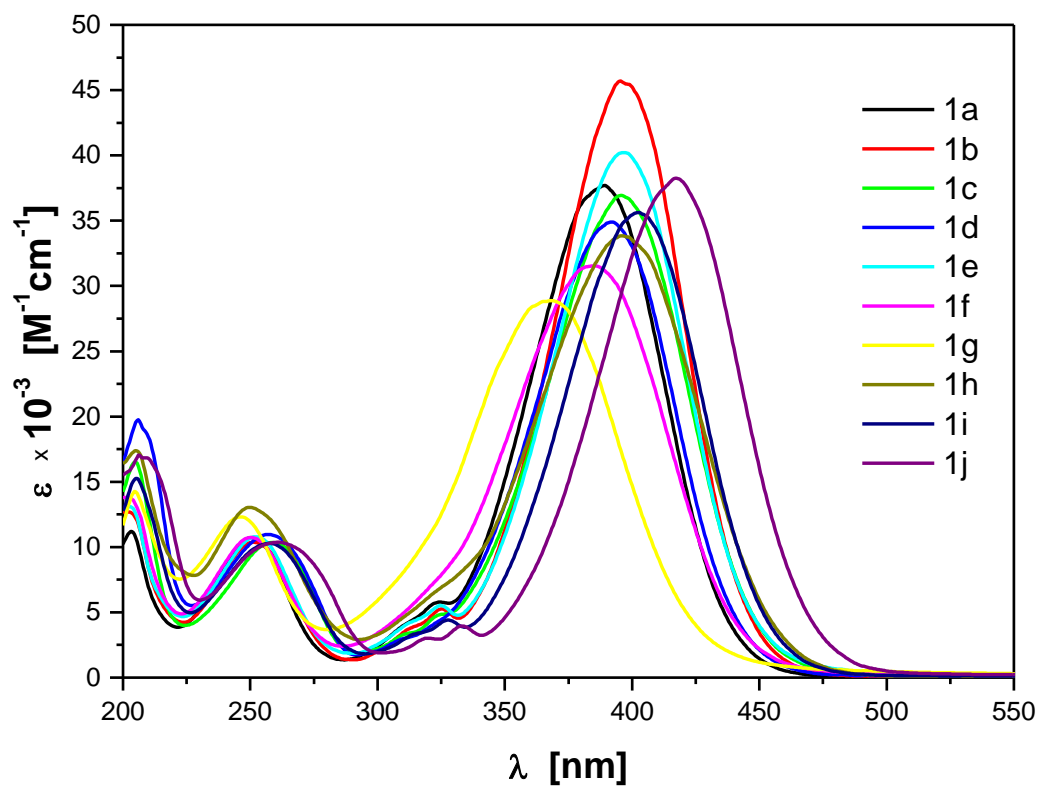

Fig. S2. Electronic absorption spectra of tested *p*-aminocinnamaldehydes in methanol.

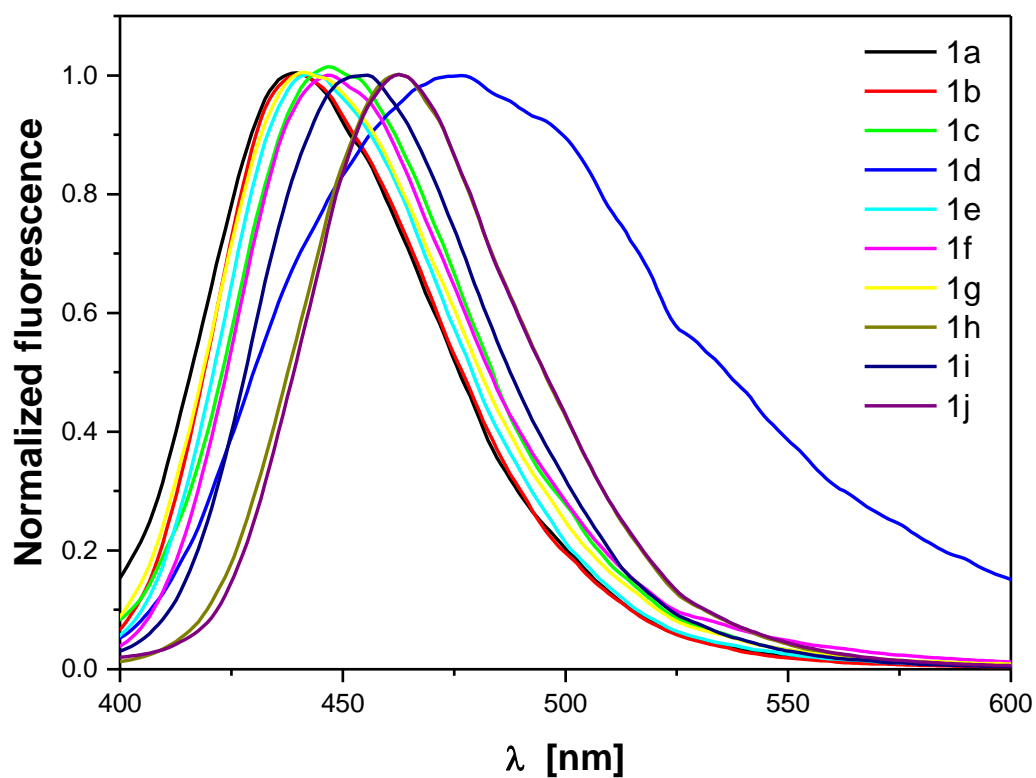

Fig. S3. Normalized fluorescence spectra of tested *p*-aminocinnamaldehydes in ethyl acetate.

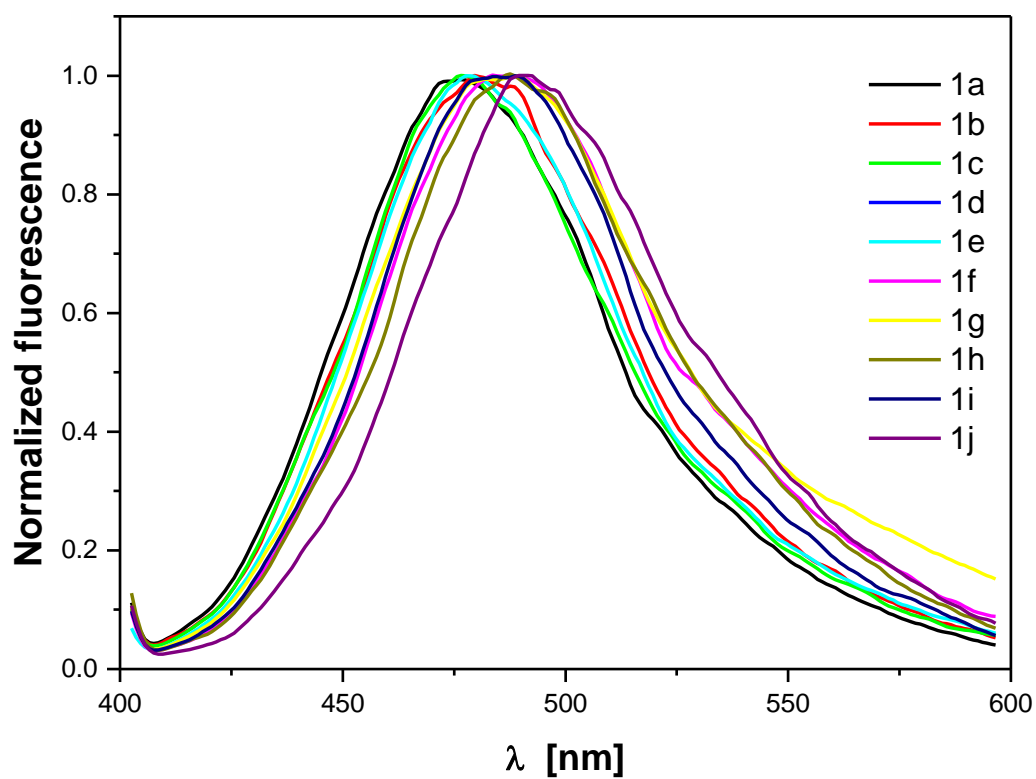

Fig. S4. Normalized fluorescence spectra of tested *p*-aminocinnamaldehydes in methanol.

# <sup>1</sup>H NMR spectrum of **1a**

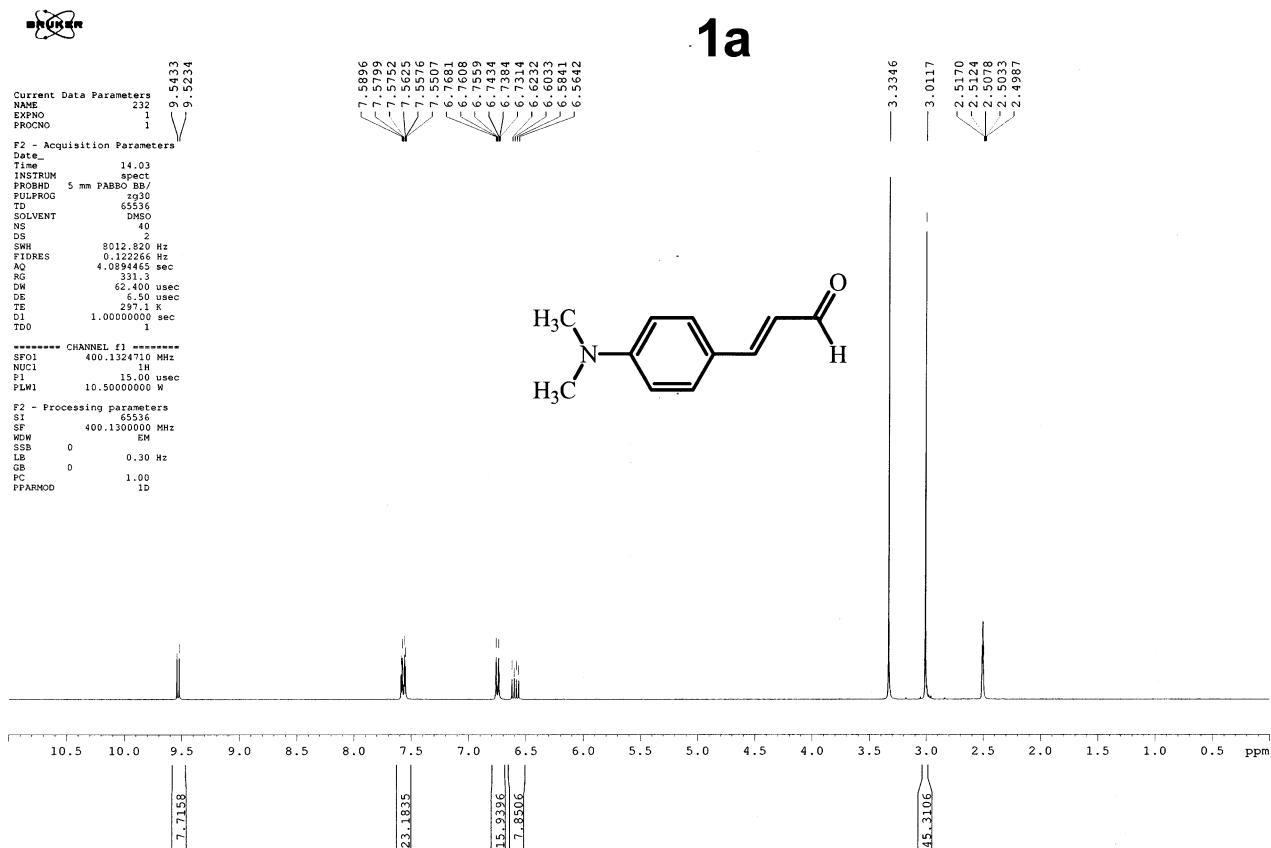

# <sup>13</sup>C NMR spectrum of **1a**

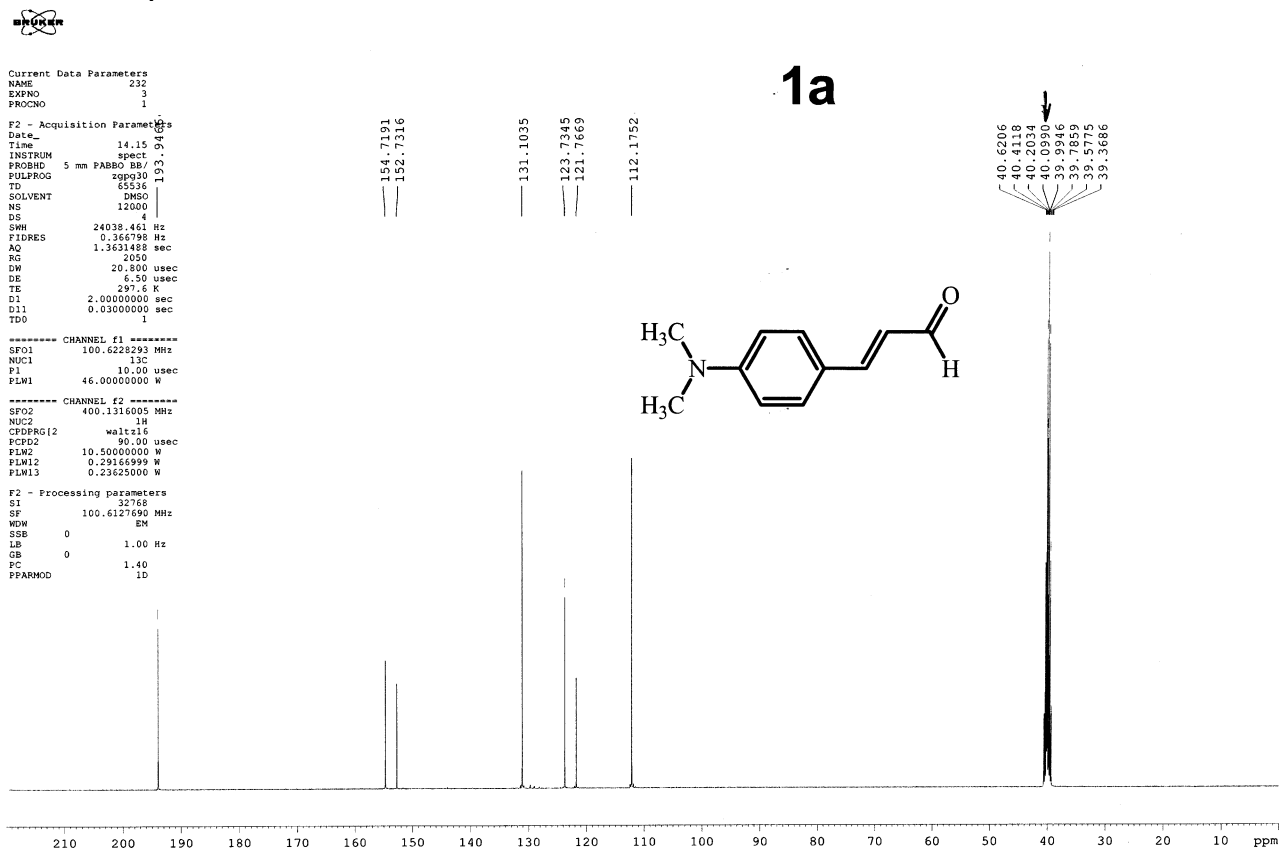

# <sup>1</sup>H NMR spectrum of **1b**

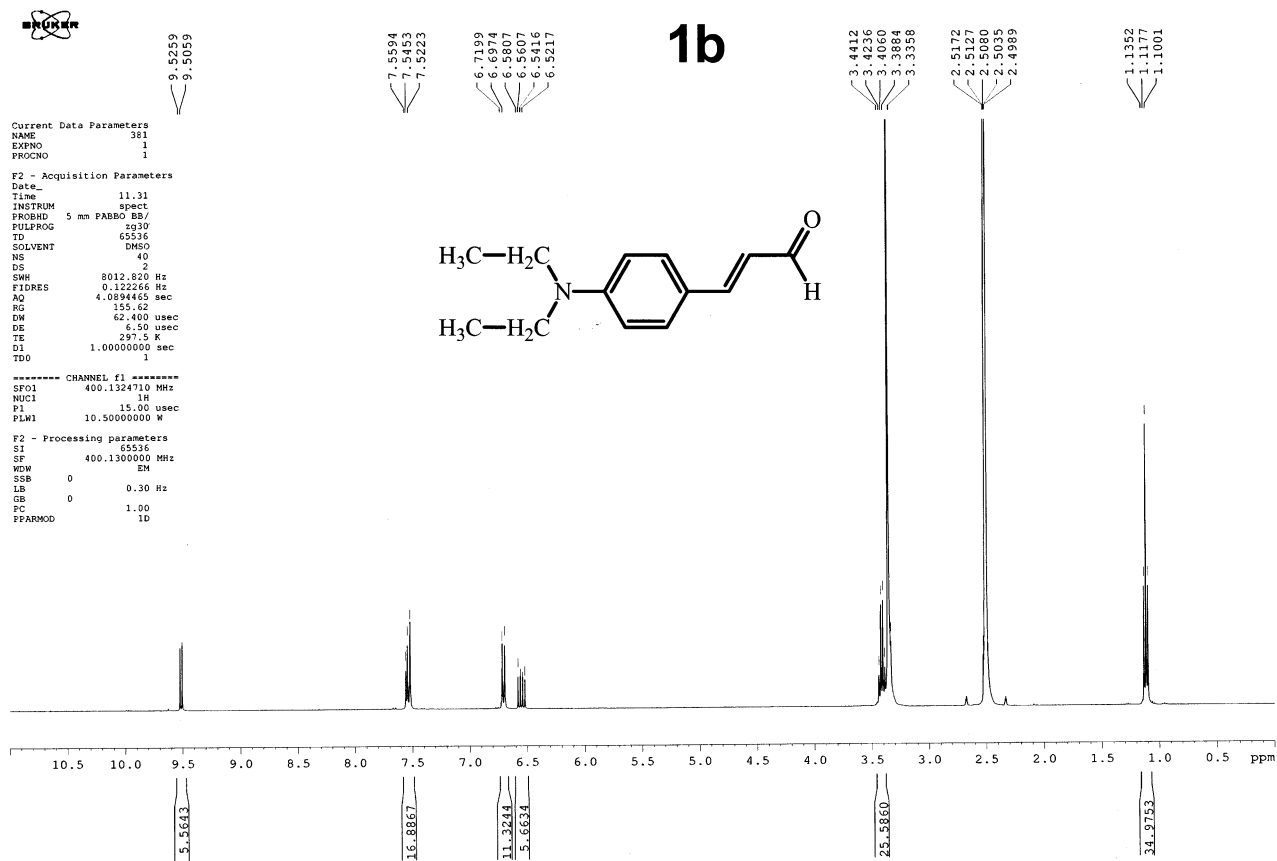

# <sup>13</sup>C NMR spectrum of **1b**

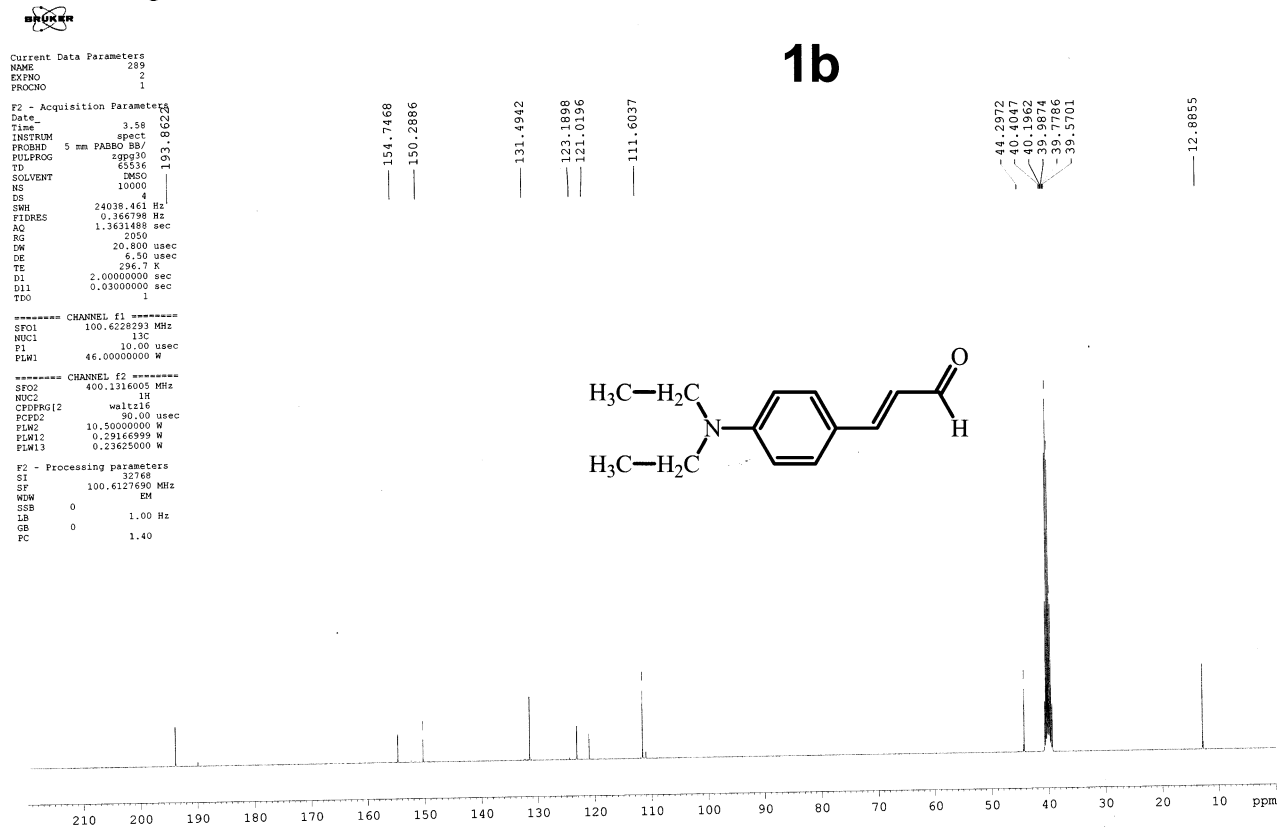

# <sup>1</sup>H NMR spectrum of **1c**

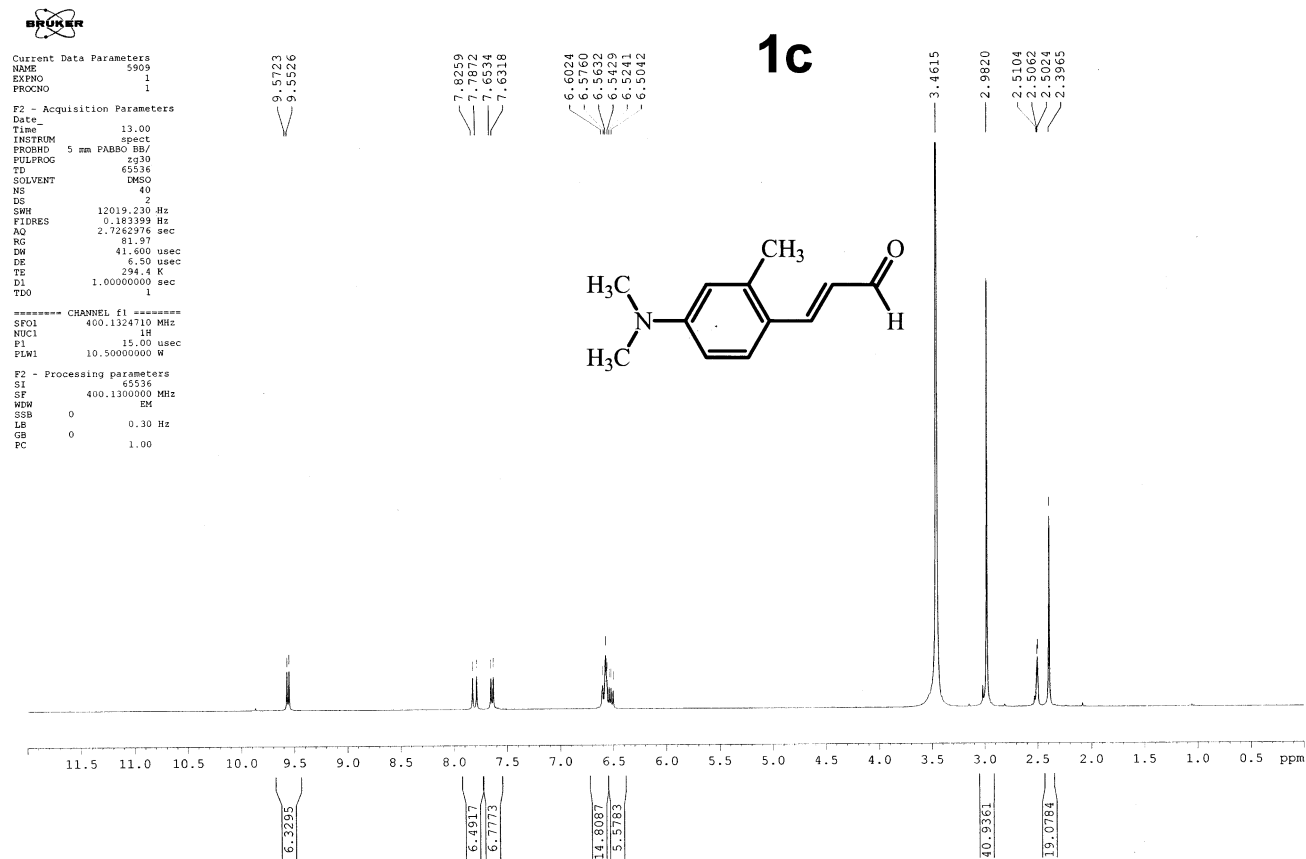

# <sup>13</sup>C NMR spectrum of **1c**

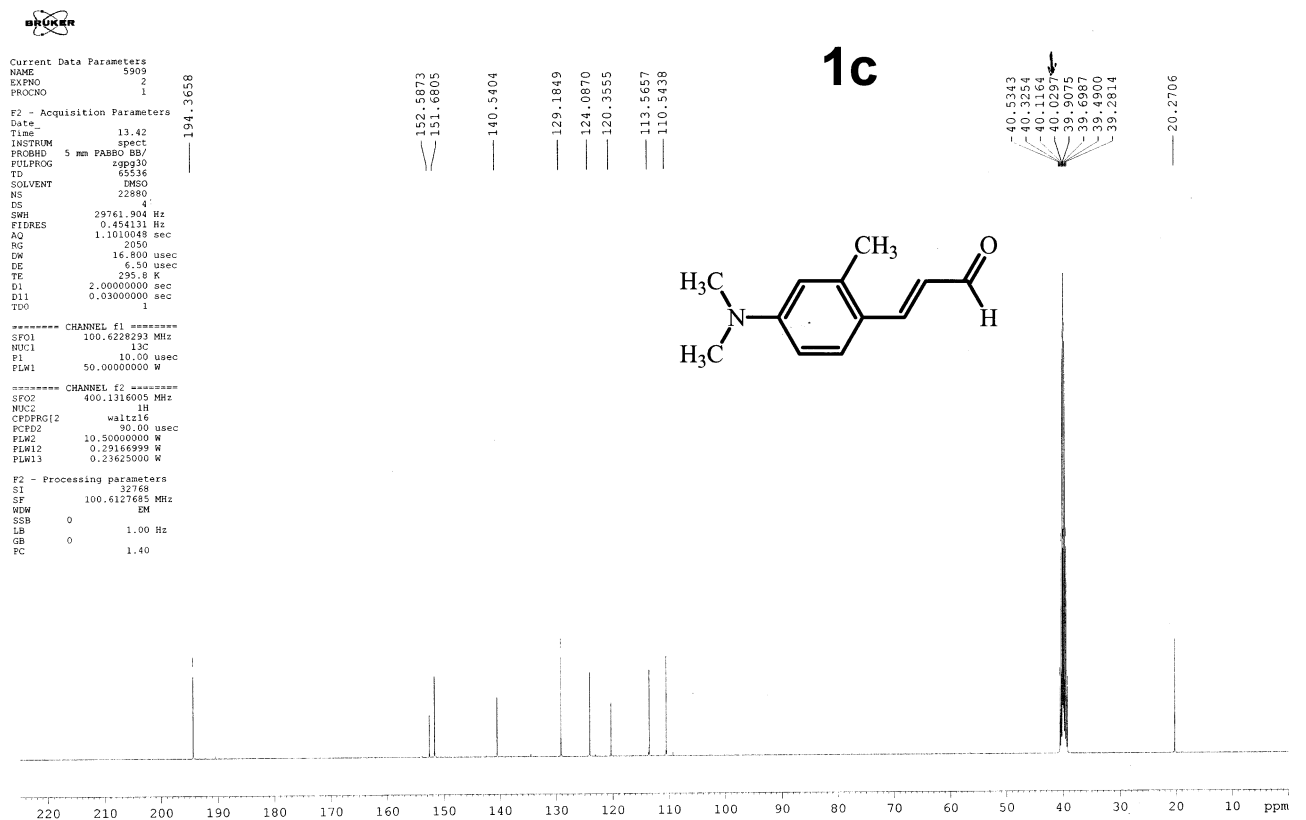

# <sup>1</sup>H NMR spectrum of **1d**

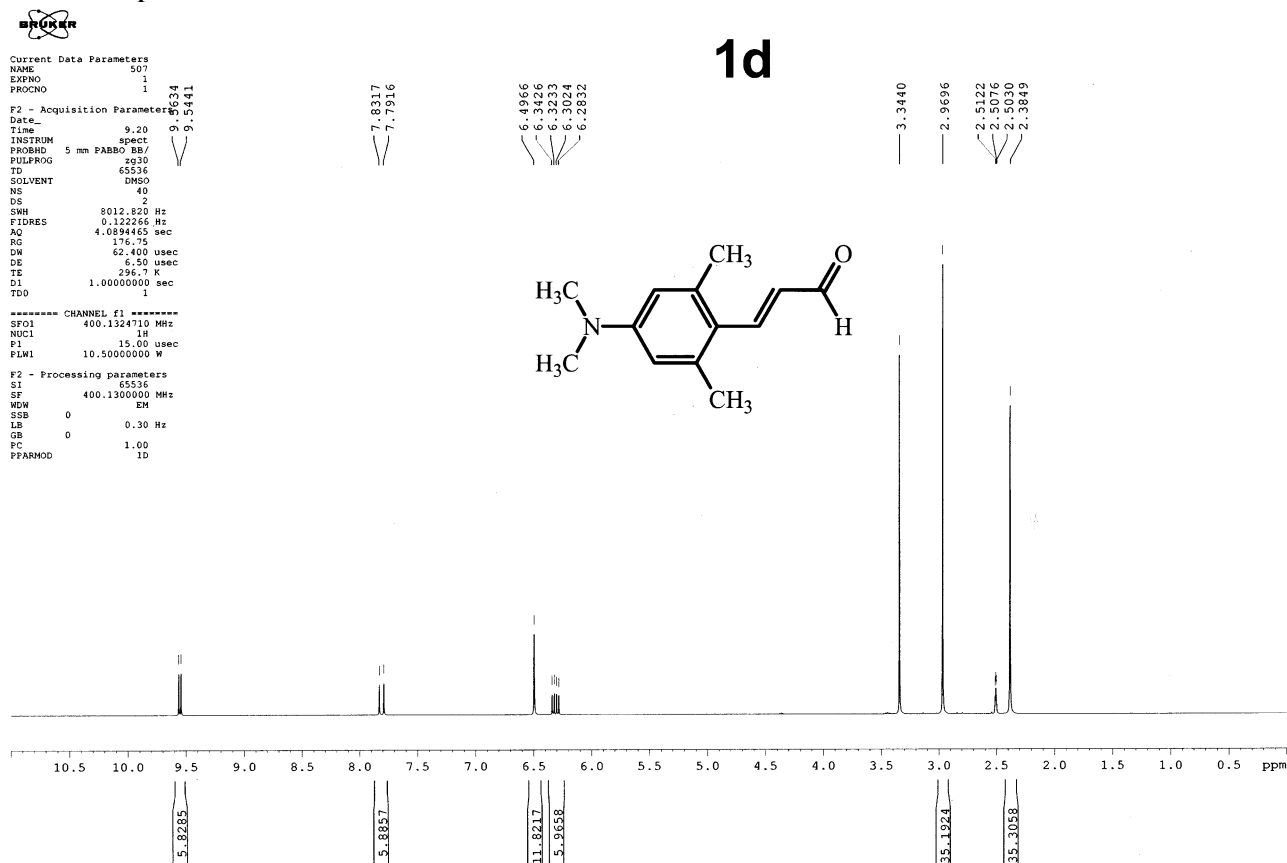

# <sup>13</sup>C NMR spectrum of **1d**

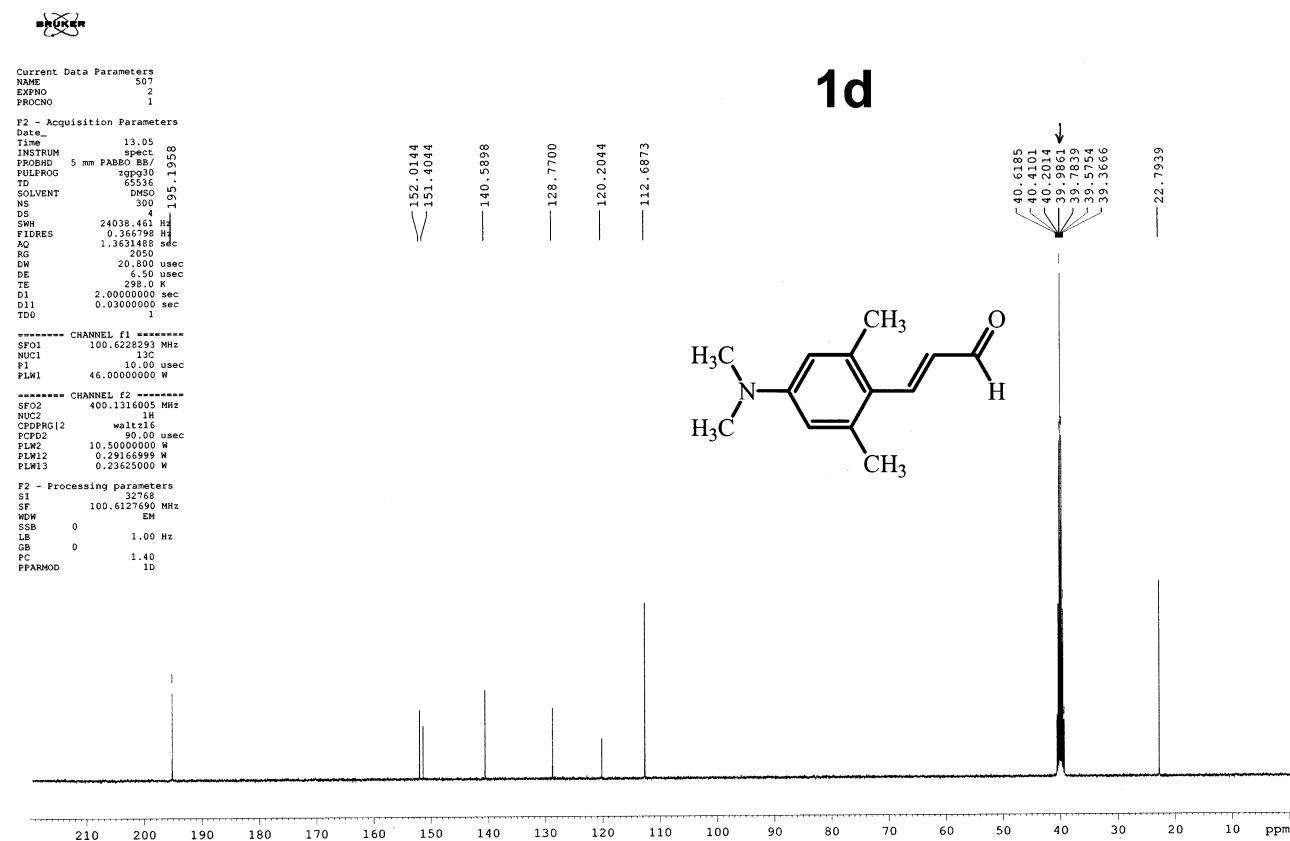

# <sup>1</sup>H NMR spectrum of **1e**

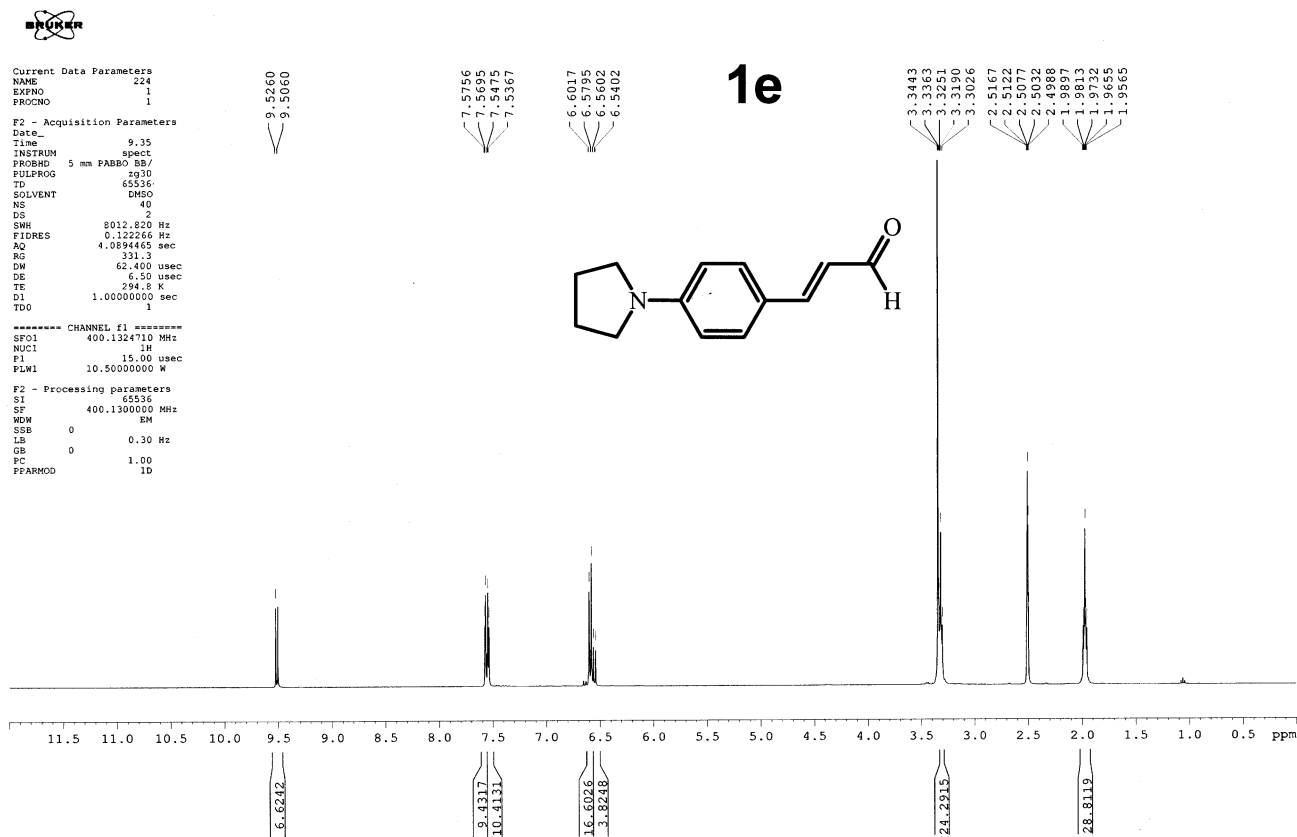

# <sup>13</sup>C NMR spectrum of **1e**

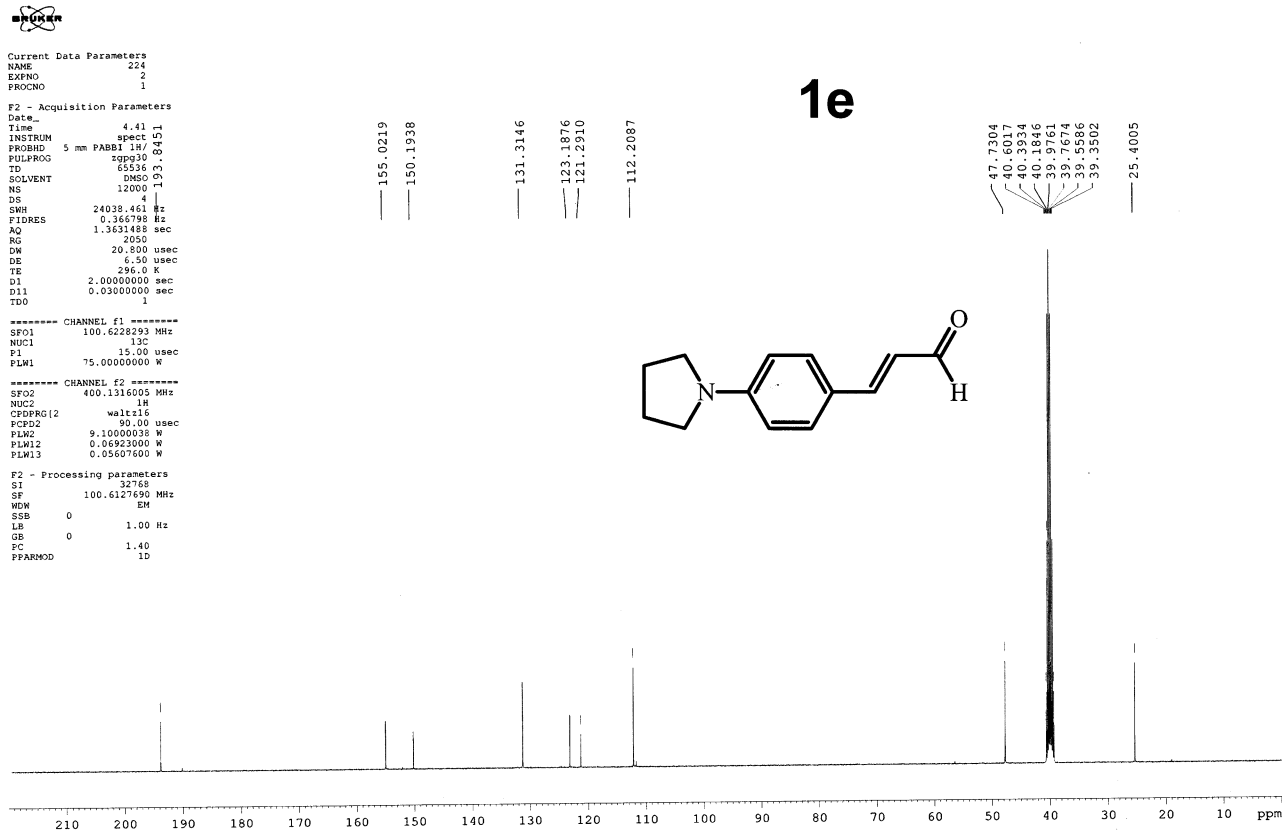



# <sup>1</sup>H NMR spectrum of **1f**

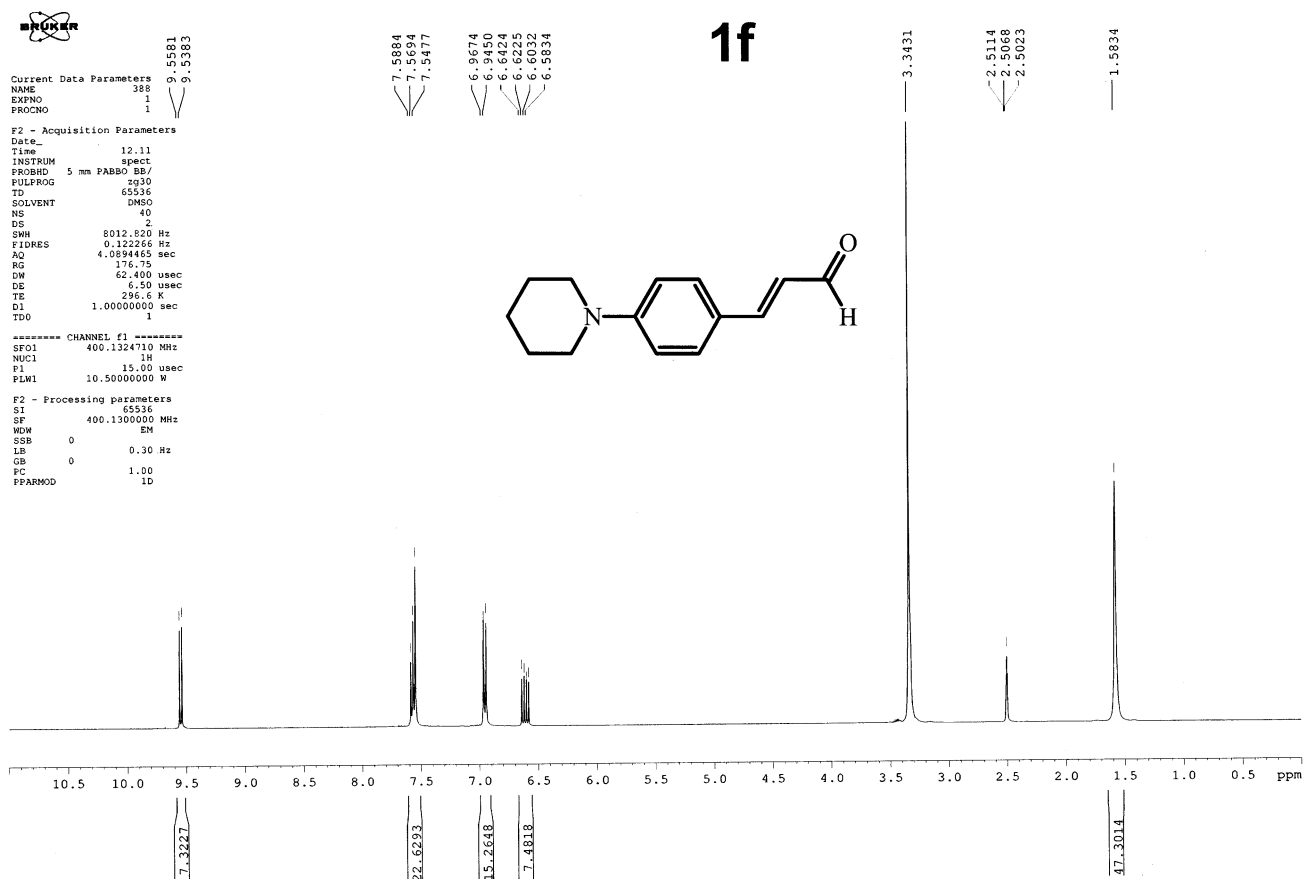

# <sup>13</sup>C NMR spectrum of **1f**

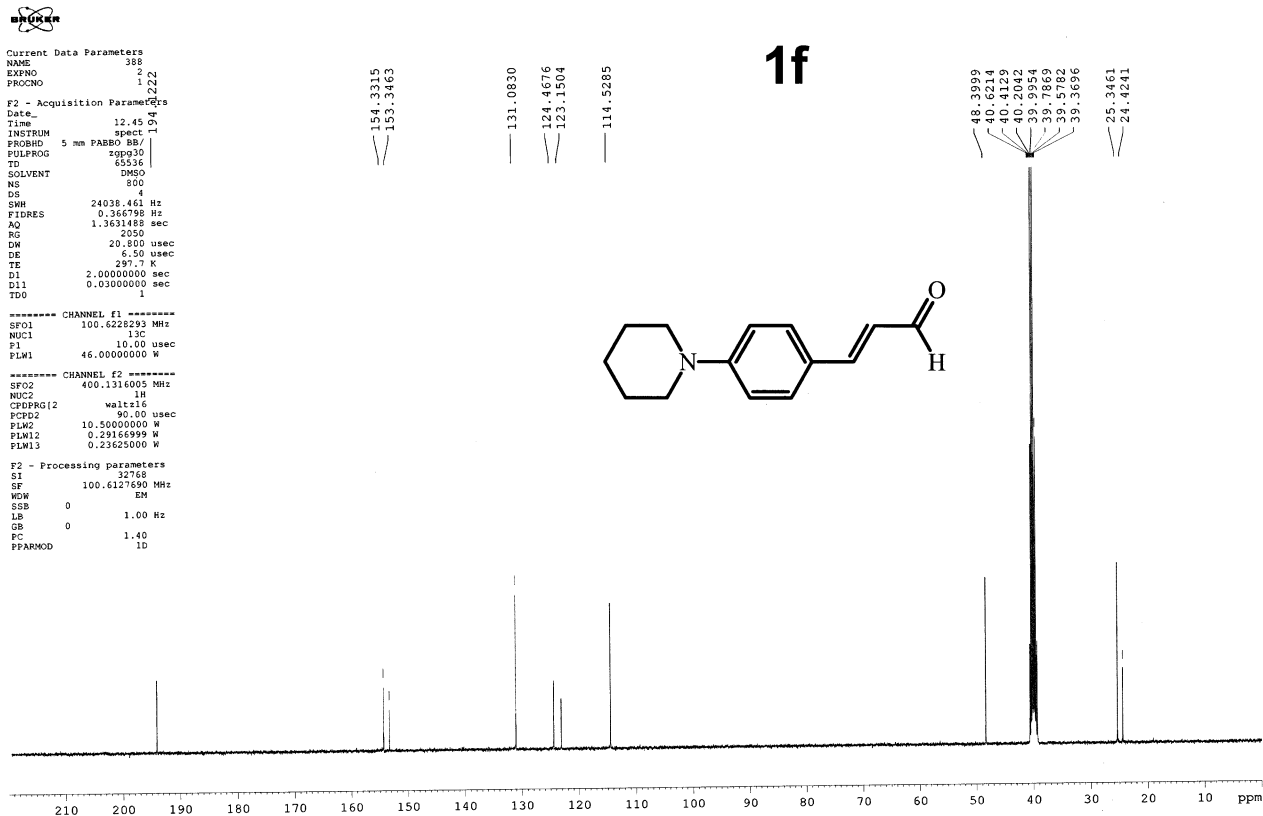

# <sup>1</sup>H NMR spectrum of **1g**

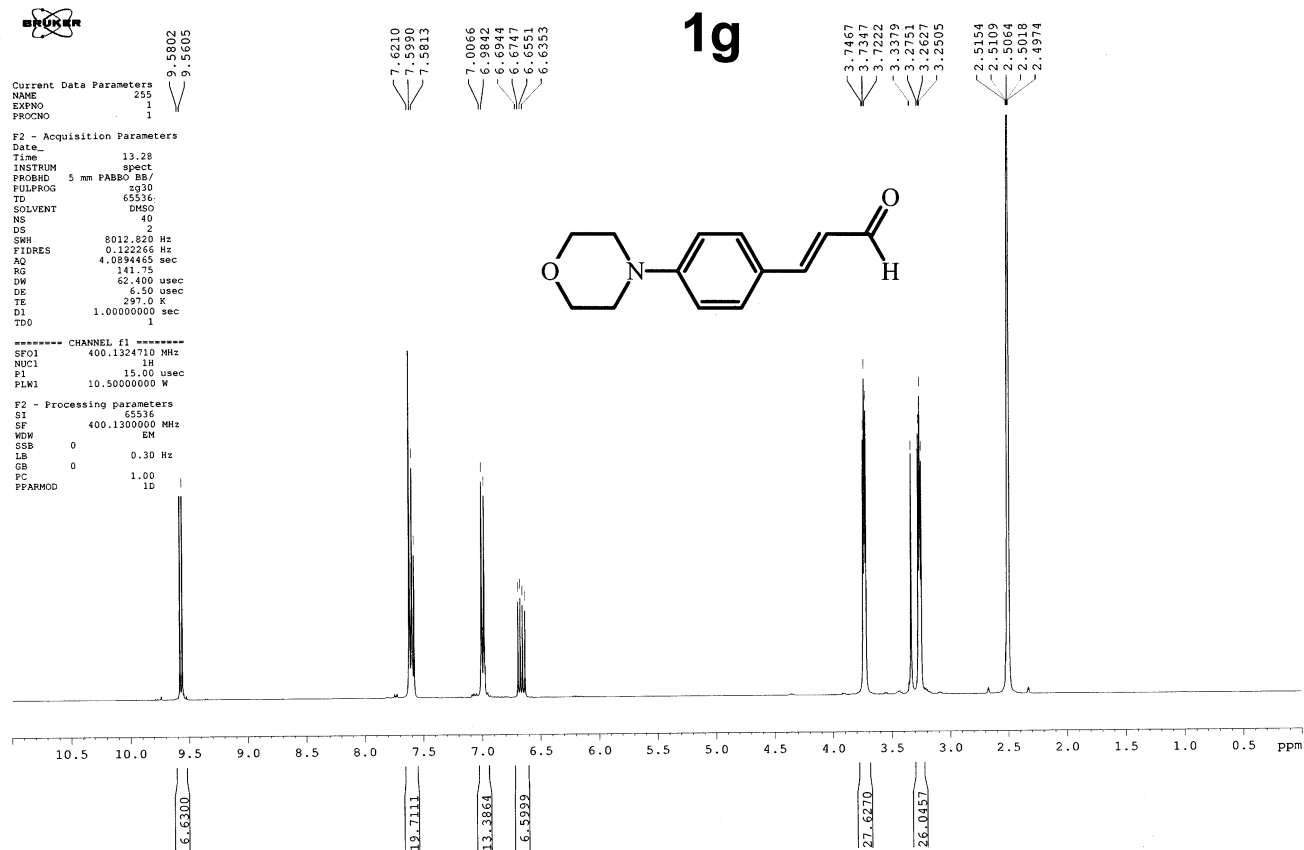

# <sup>13</sup>C NMR spectrum of **1g**

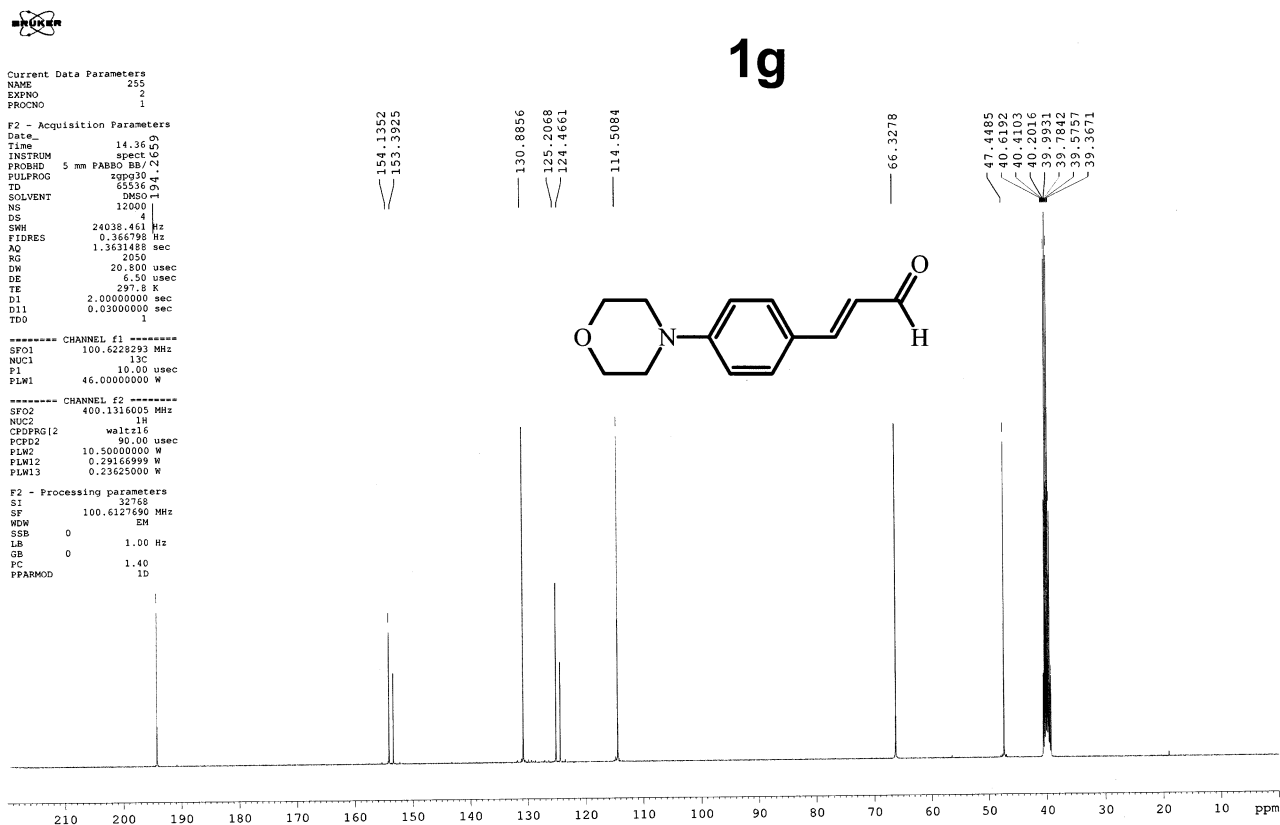

# <sup>1</sup>H NMR spectrum of **1h**

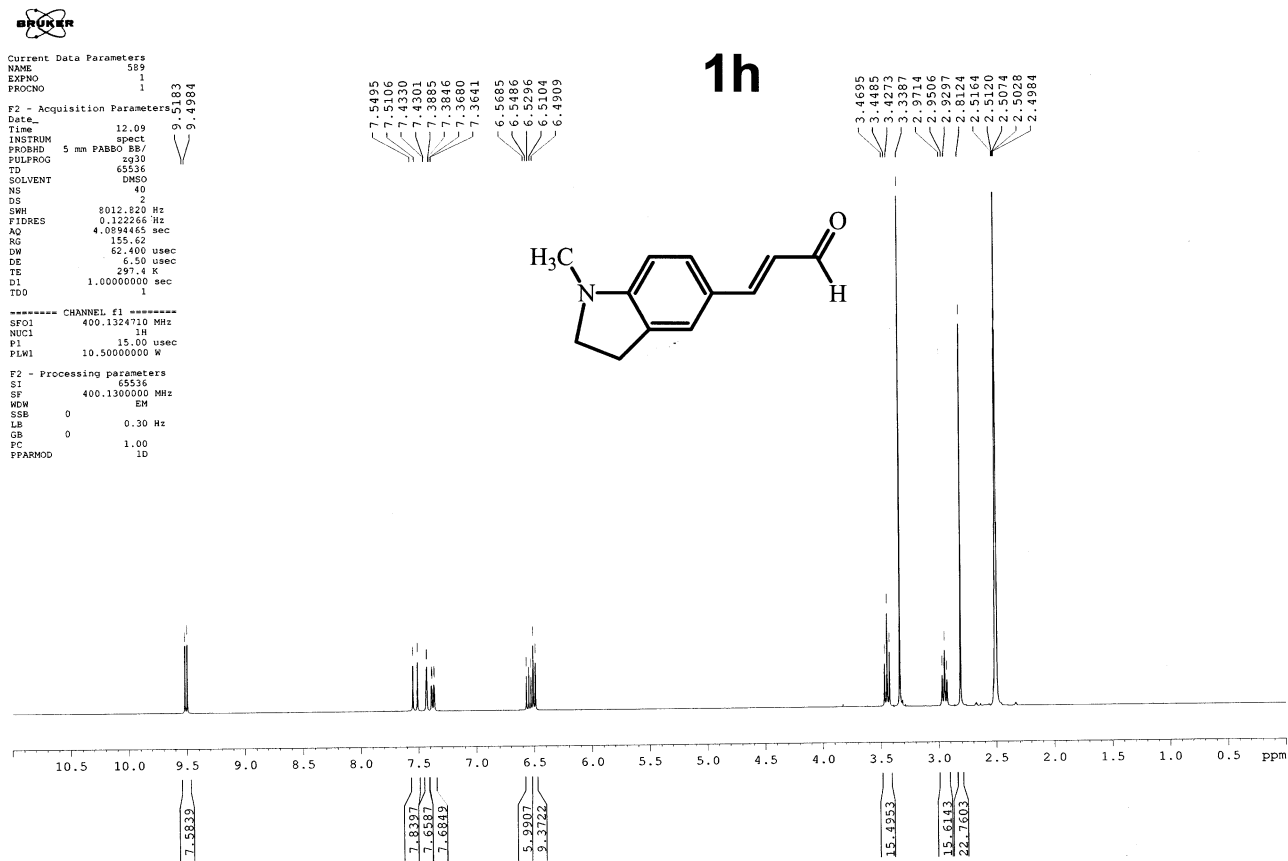

# <sup>13</sup>C NMR spectrum of **1h**

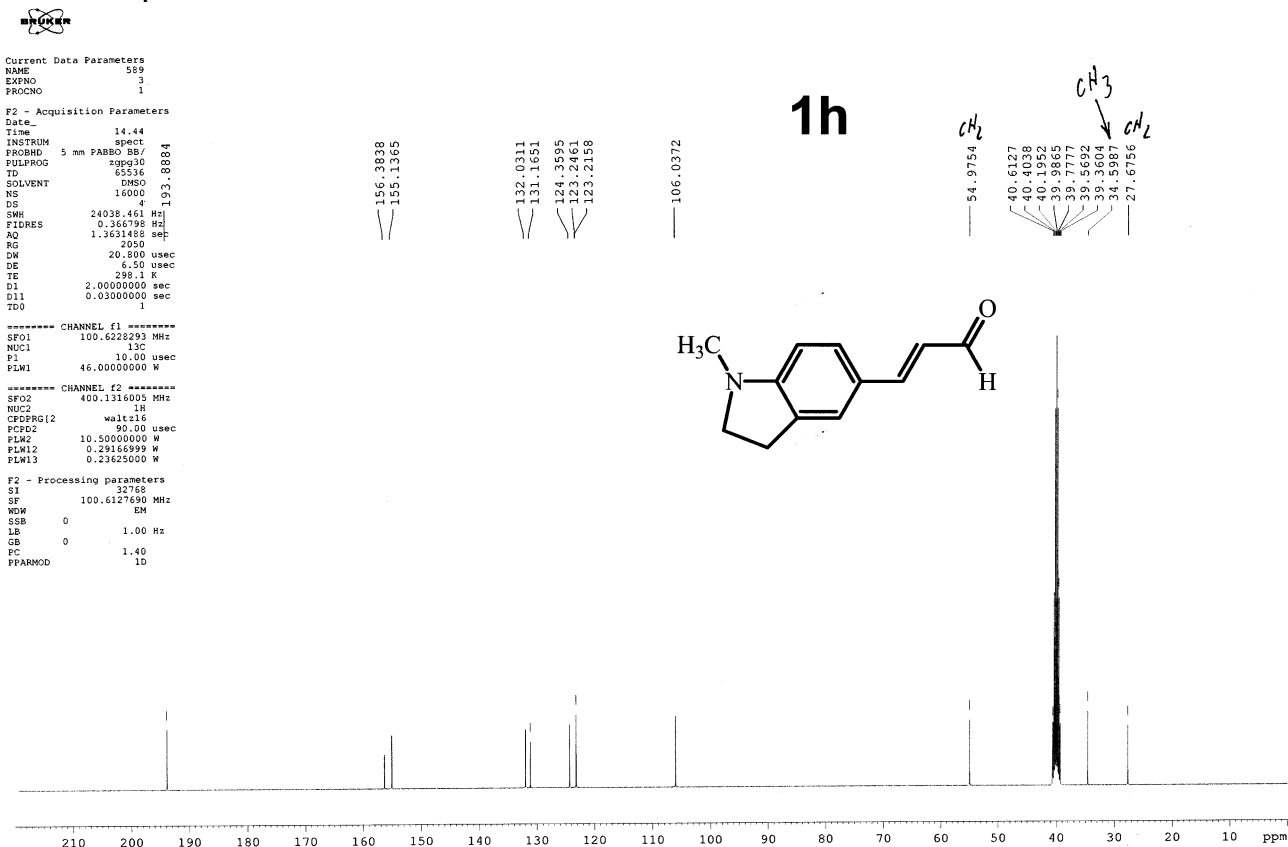

<sup>1</sup>H NMR spectrum of **1i**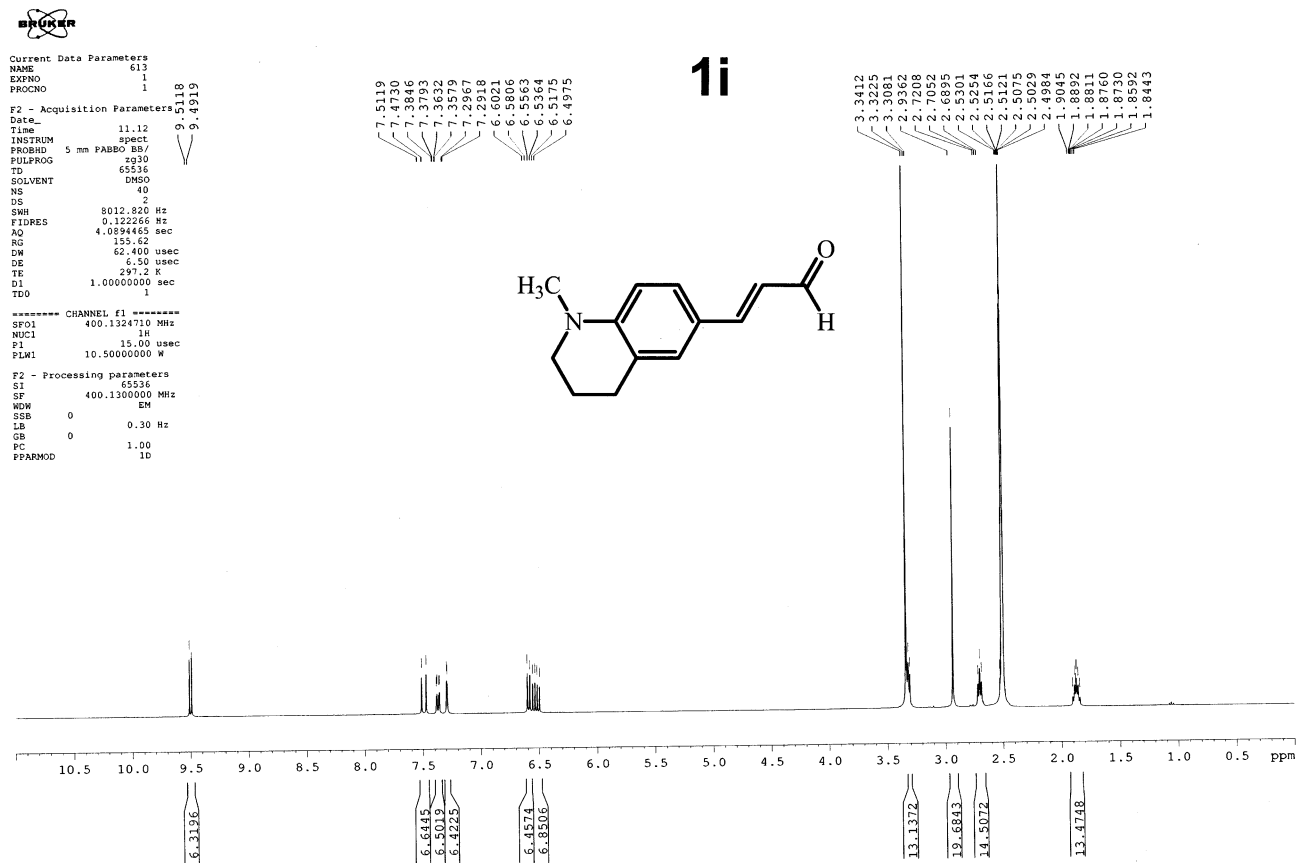 $^{13}\text{C}$  NMR spectrum of **1i**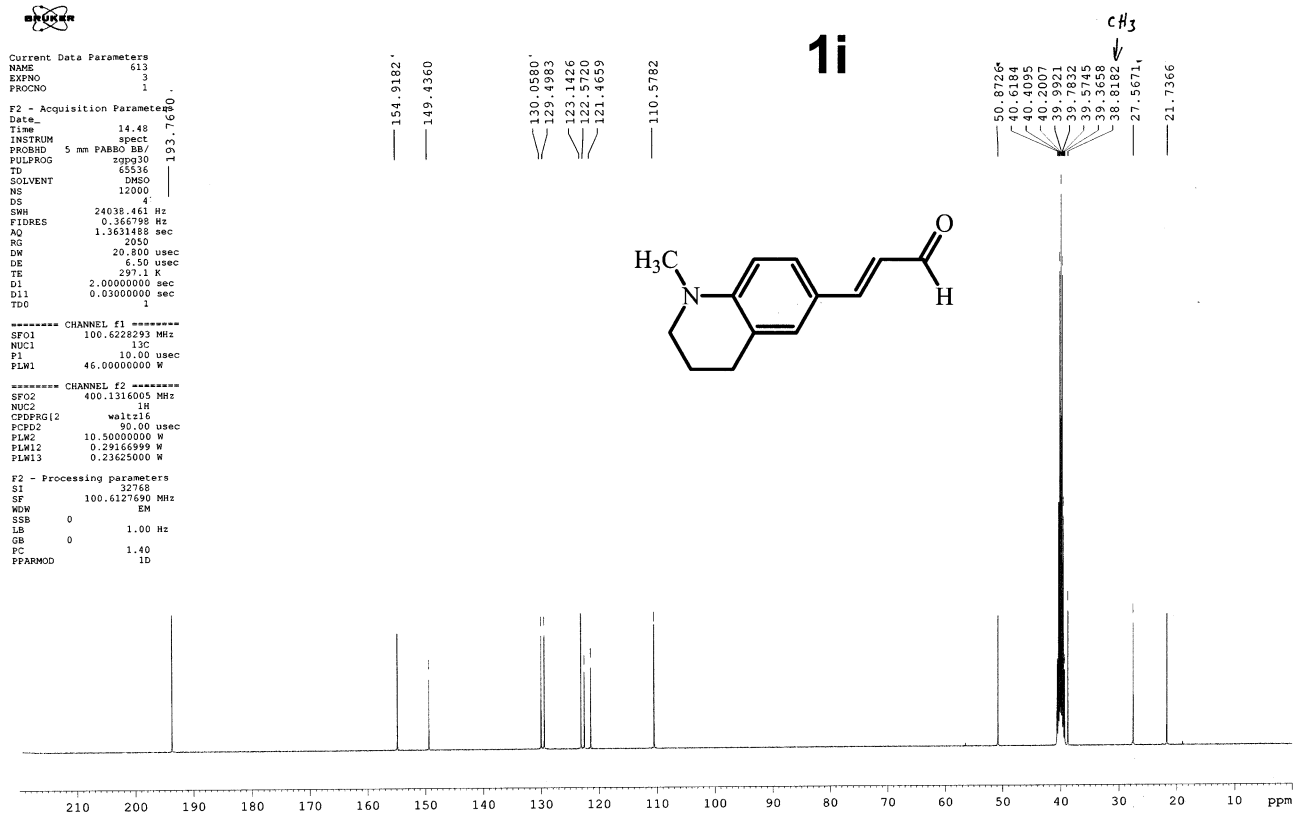

# <sup>1</sup>H NMR spectrum of **1j**

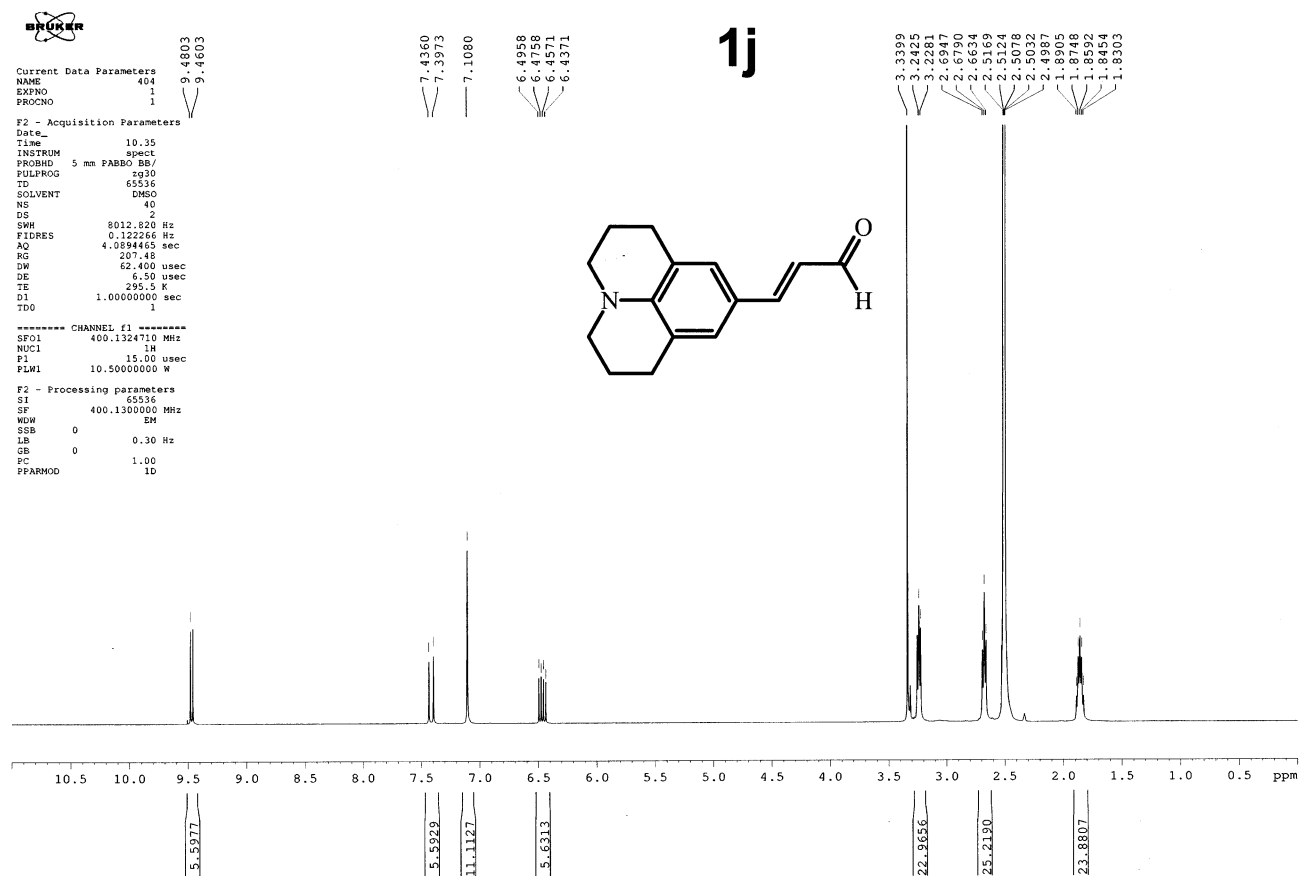

# <sup>13</sup>C NMR spectrum of **1j**

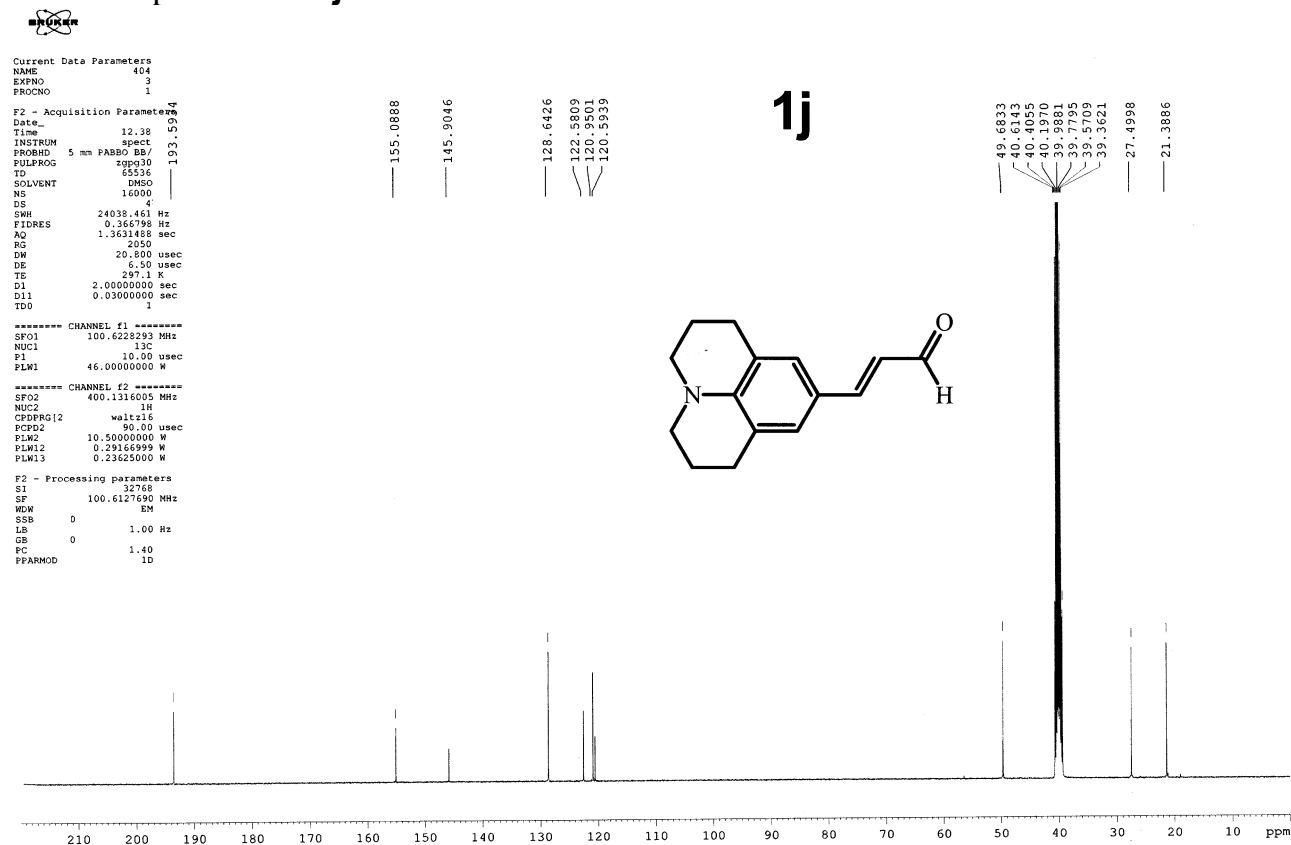

# IR spectrum of **1a**

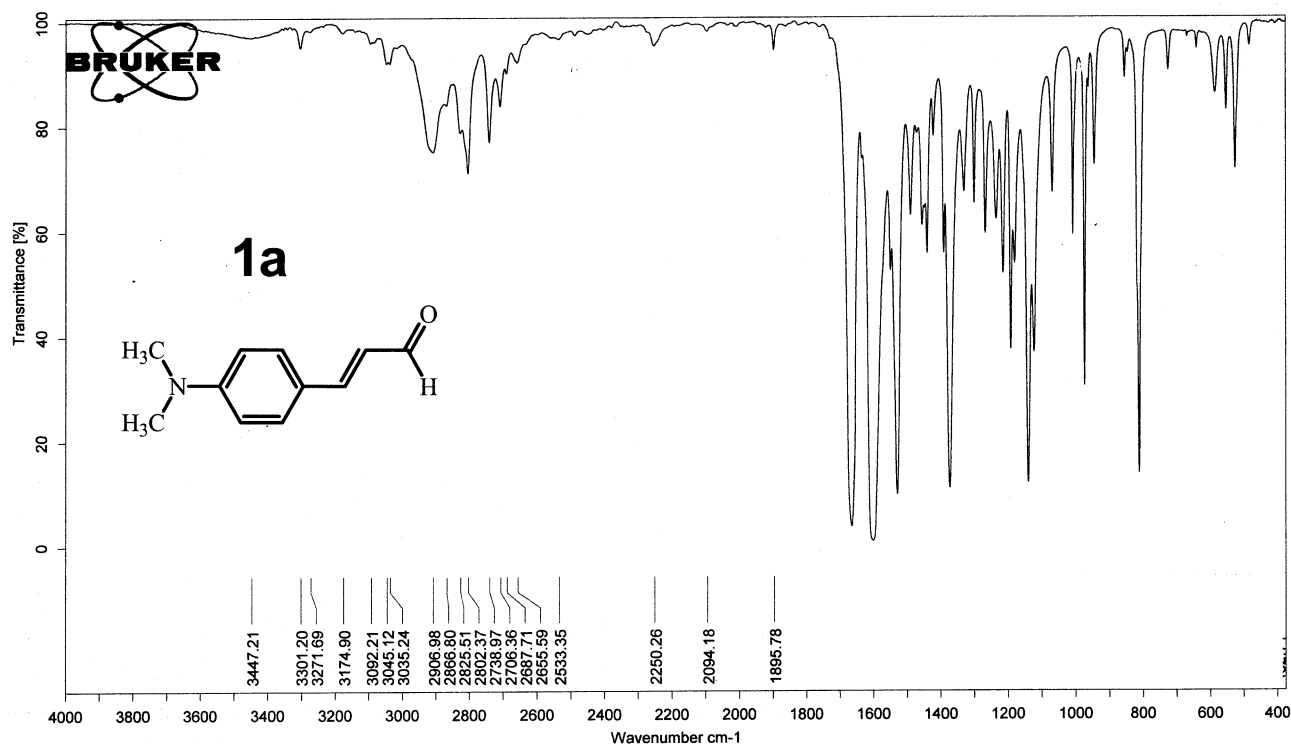

## Enlarged spectrum in the range of 1700 - 400 $\text{cm}^{-1}$ .

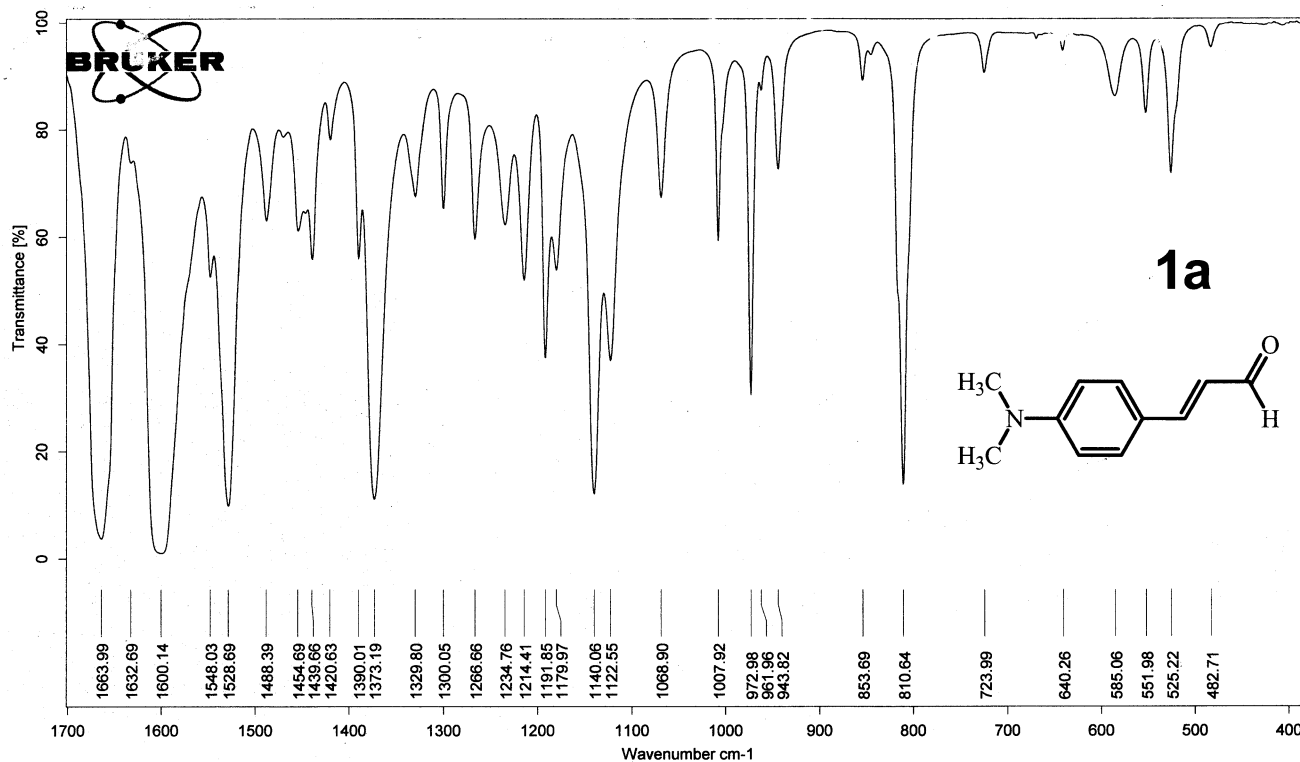

# IR spectrum of **1b**

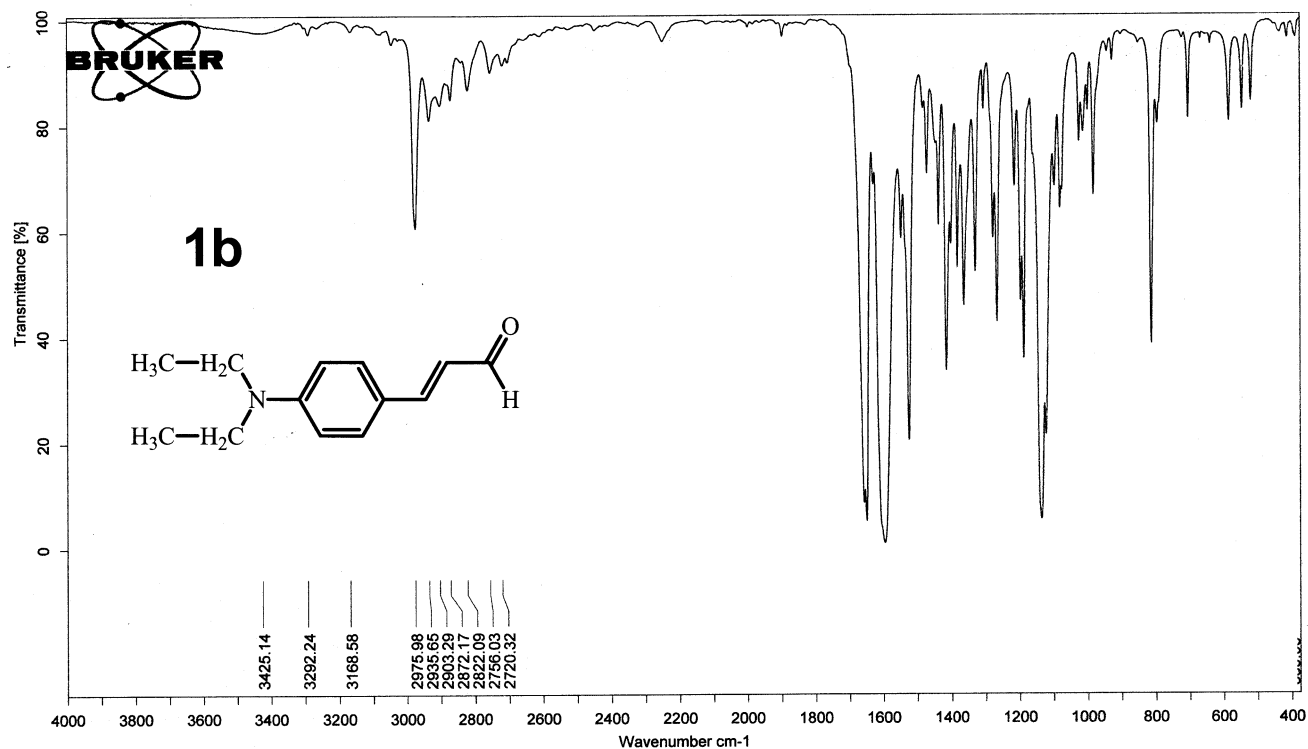

## Enlarged spectrum in the range of 1700 - 400 $\text{cm}^{-1}$ .

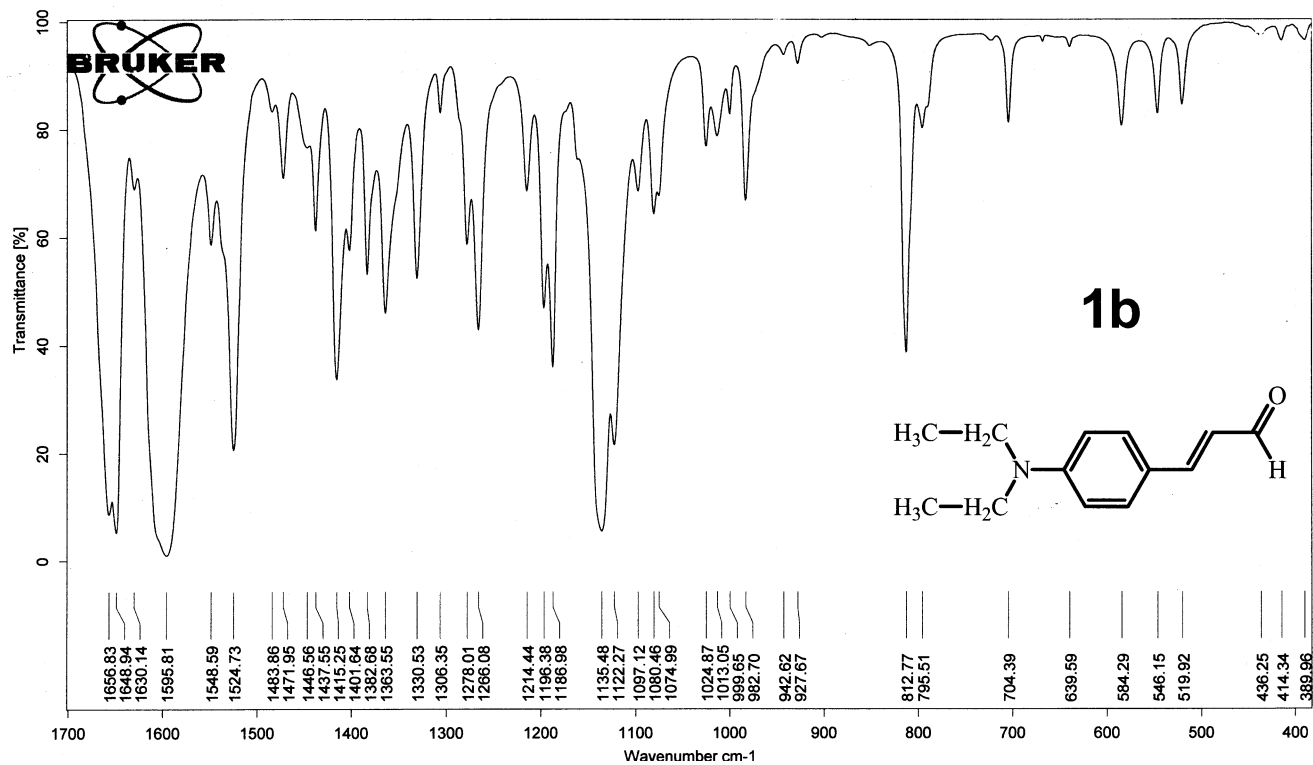

# IR spectrum of **1c**

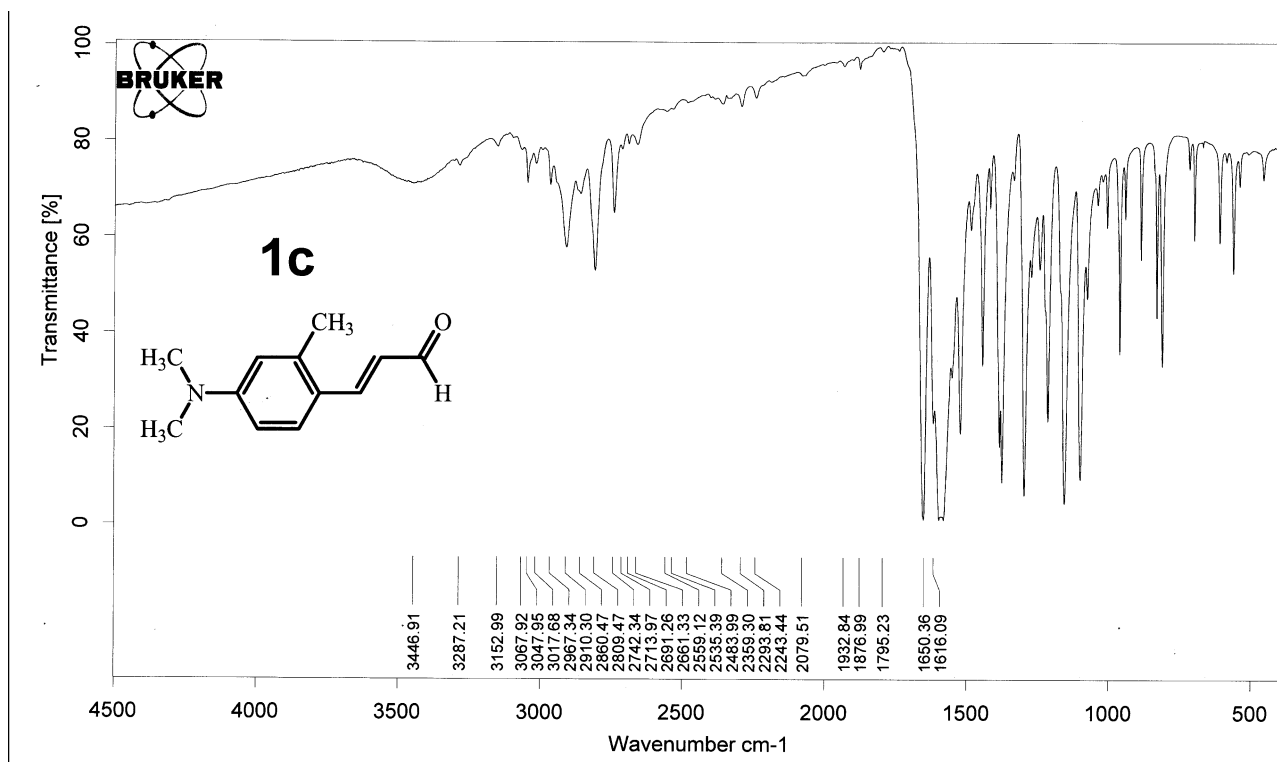

Enlarged spectrum in the range of 1700 - 400  $\text{cm}^{-1}$ .

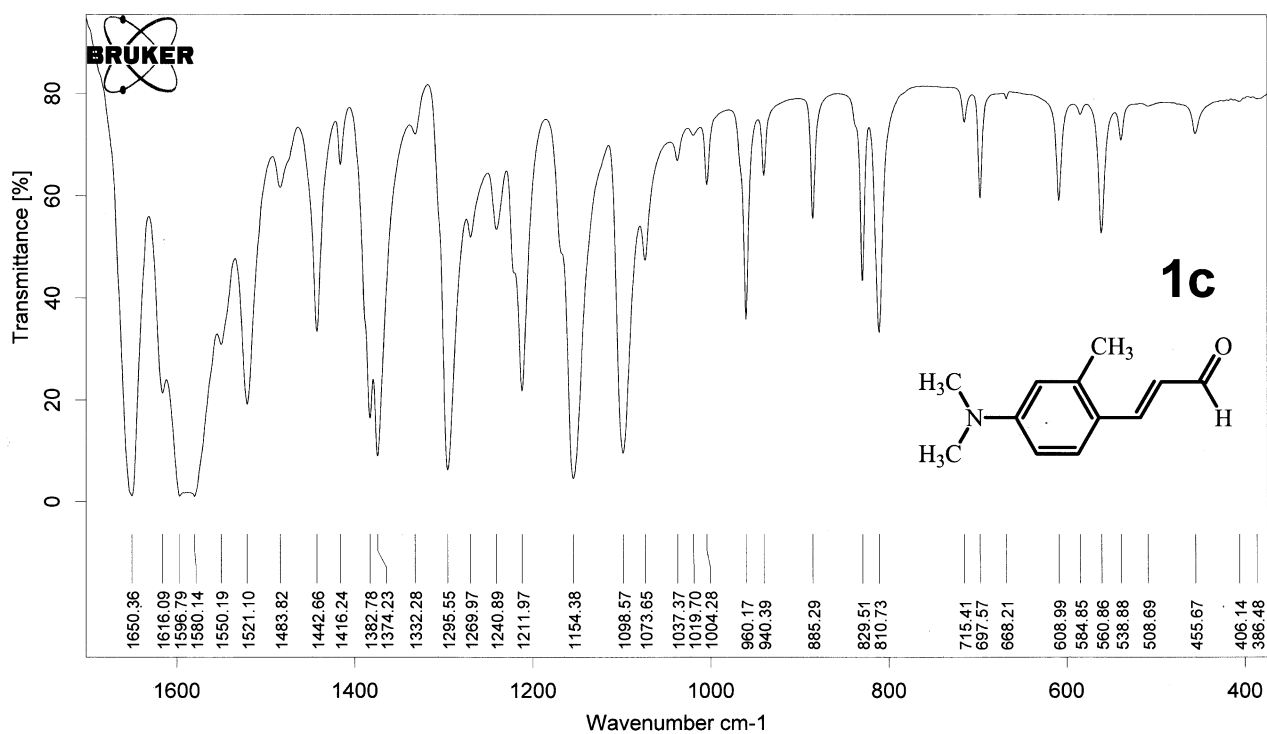



# IR spectrum of 1d

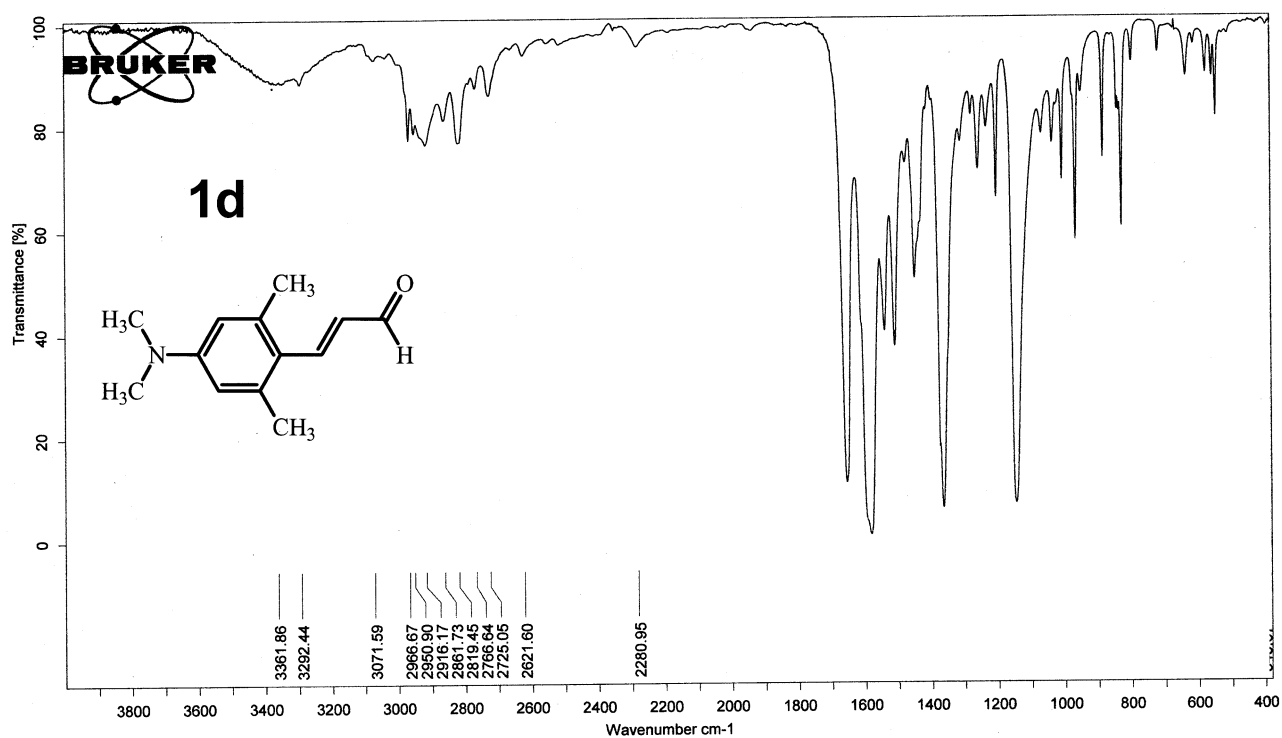

## Enlarged spectrum in the range of 1700 - 400 cm<sup>-1</sup>.

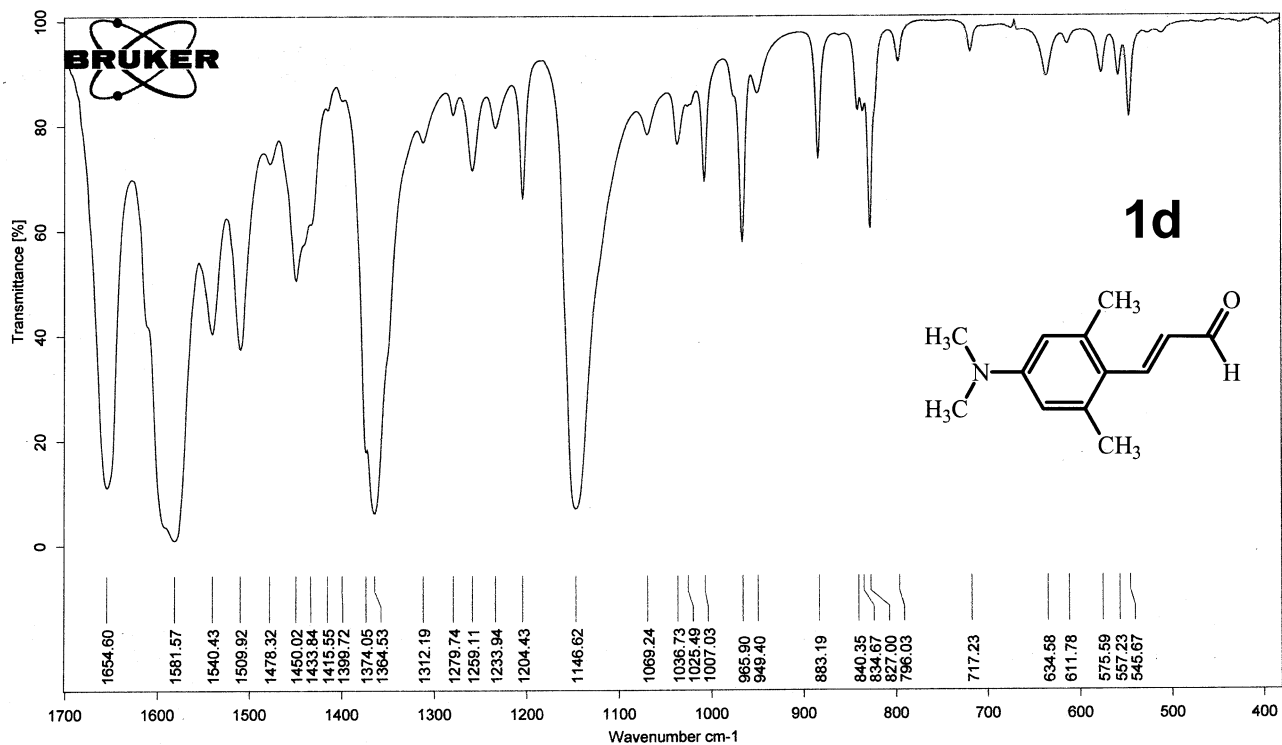

# IR spectrum of 1e

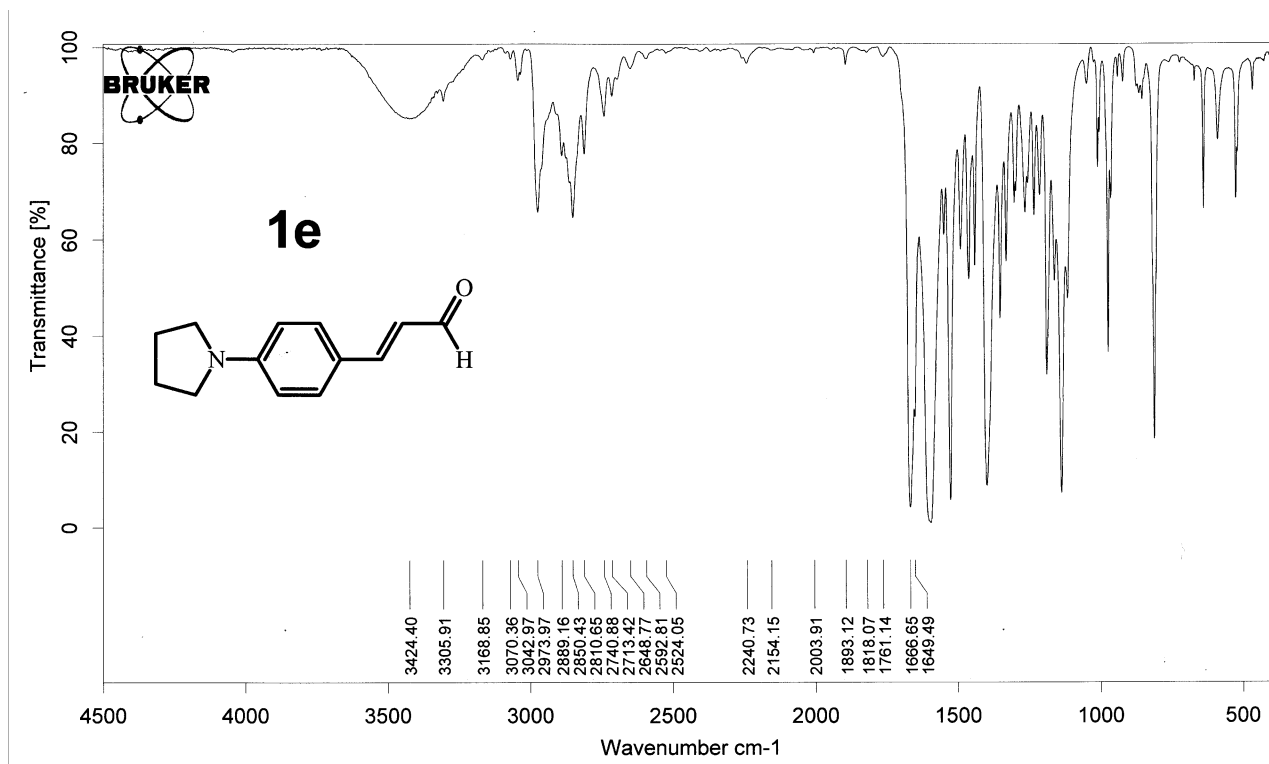

## Enlarged spectrum in the range of 1700 - 400 cm<sup>-1</sup>.

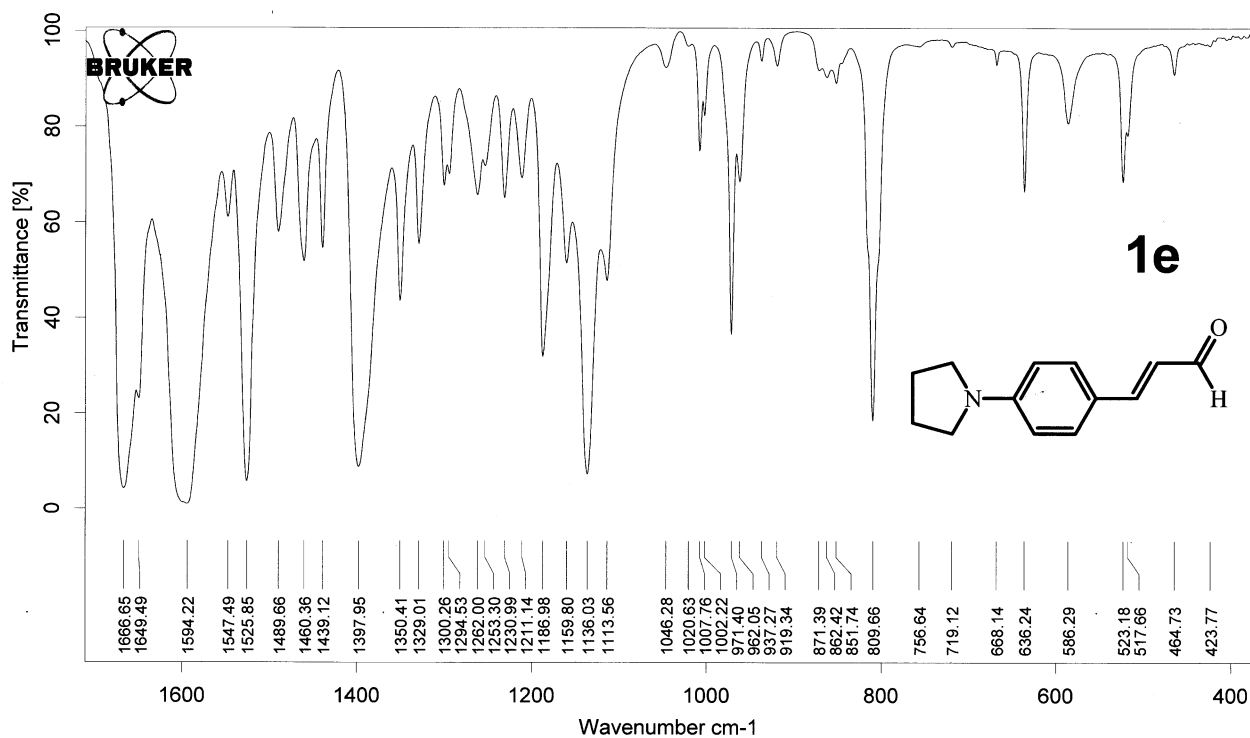

IR spectrum of **1f**

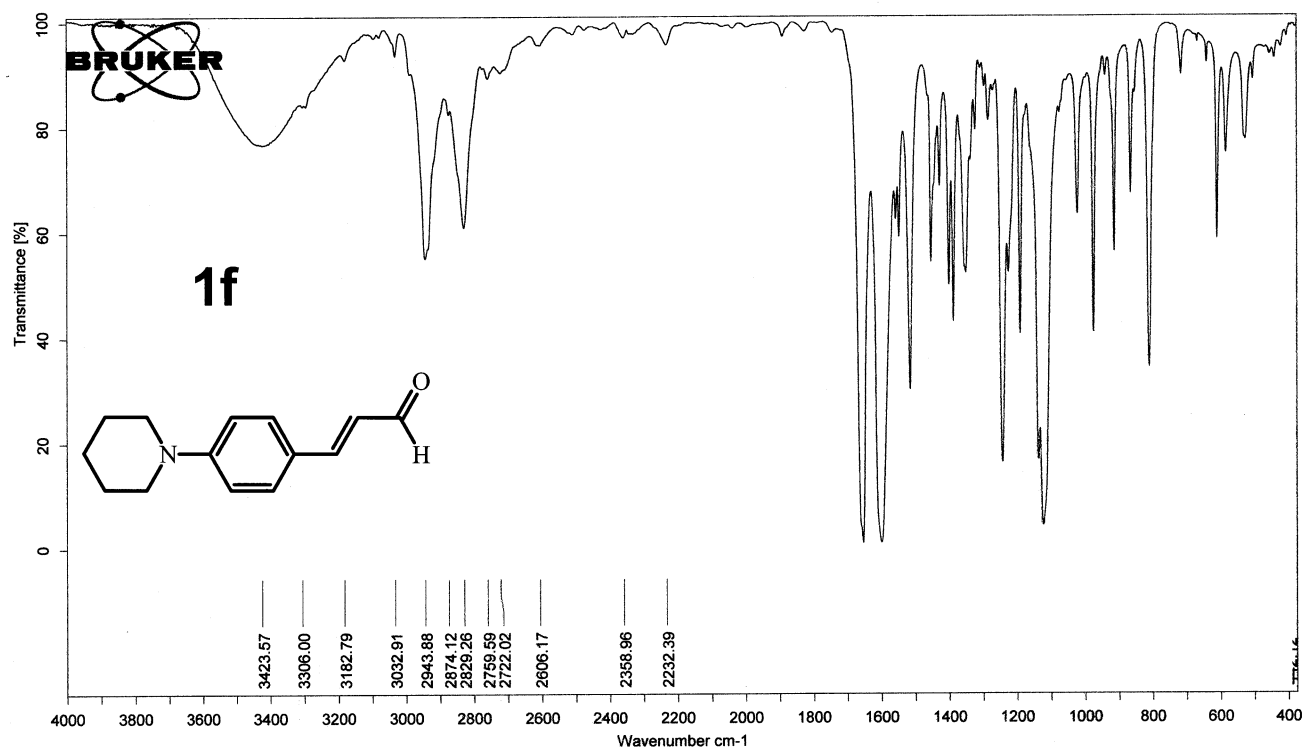

Enlarged spectrum in the range of 1700 - 400  $\text{cm}^{-1}$ .

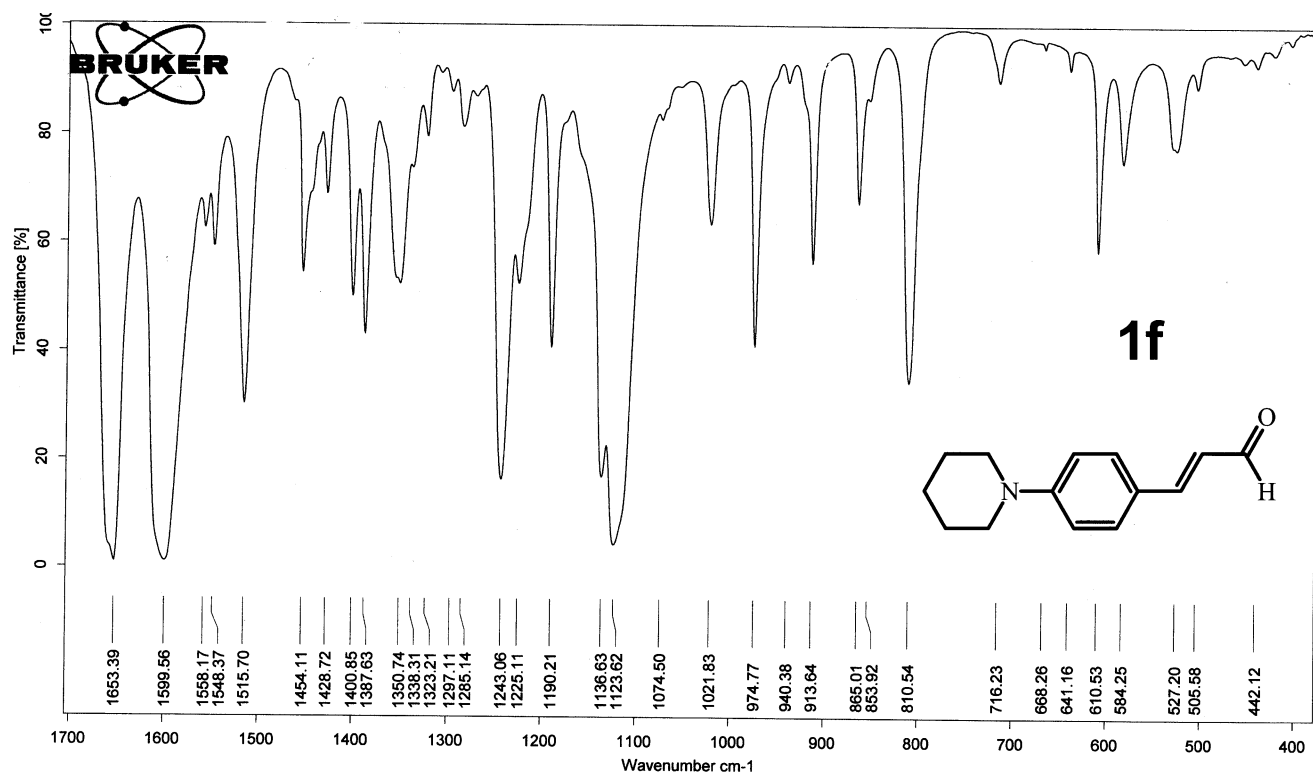

# IR spectrum of **1g**

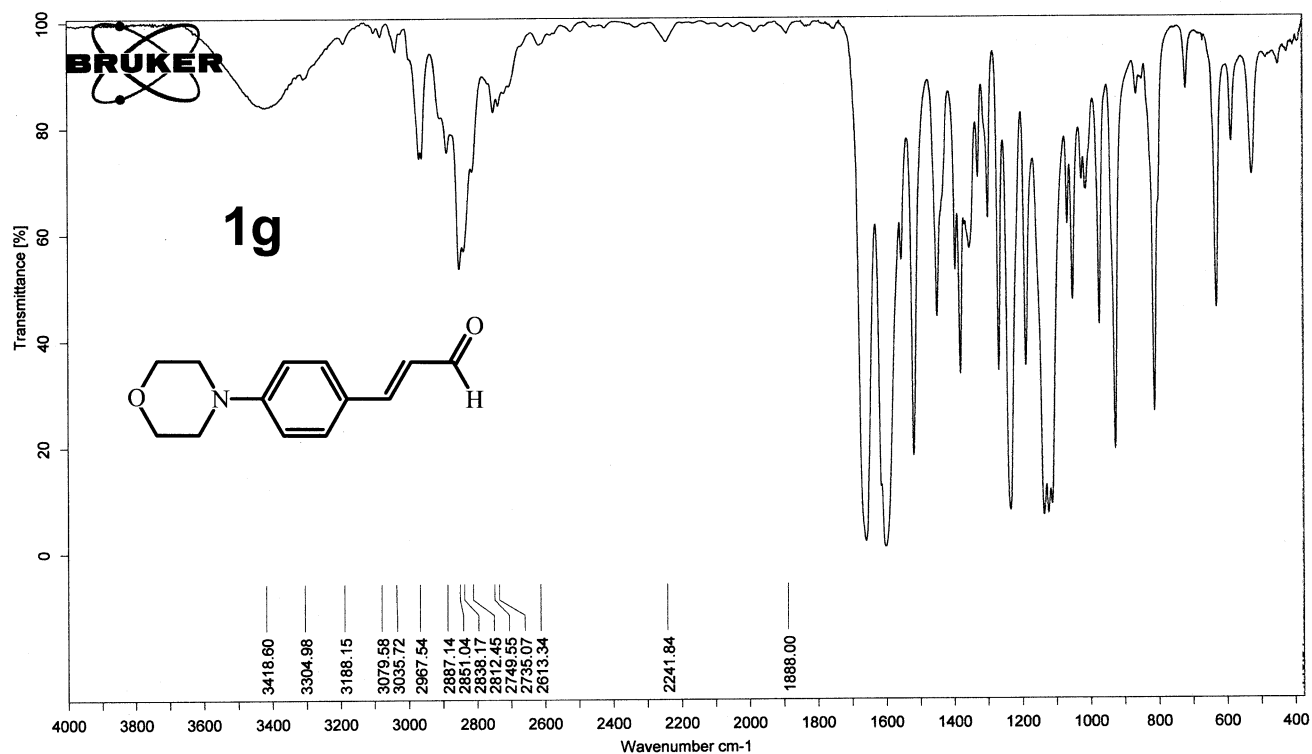

## Enlarged spectrum in the range of 1700 - 400 cm<sup>-1</sup>.

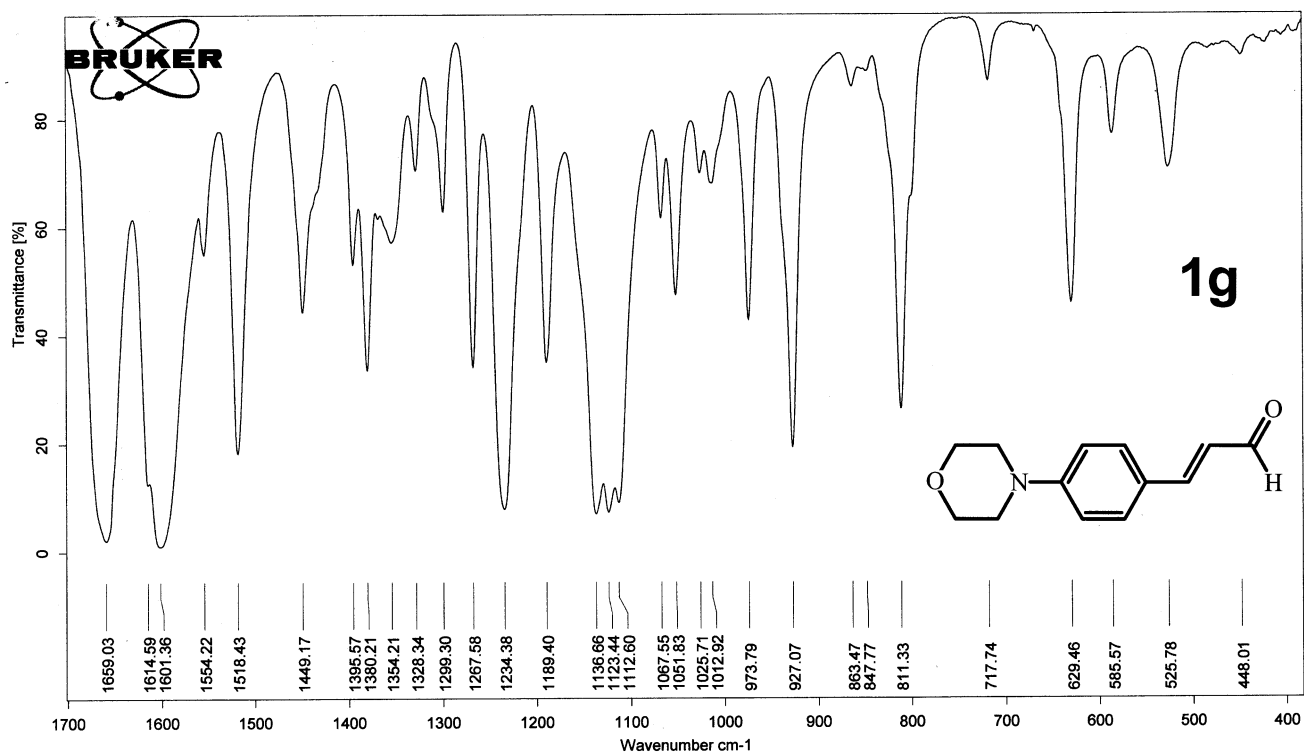

# IR spectrum of **1h**

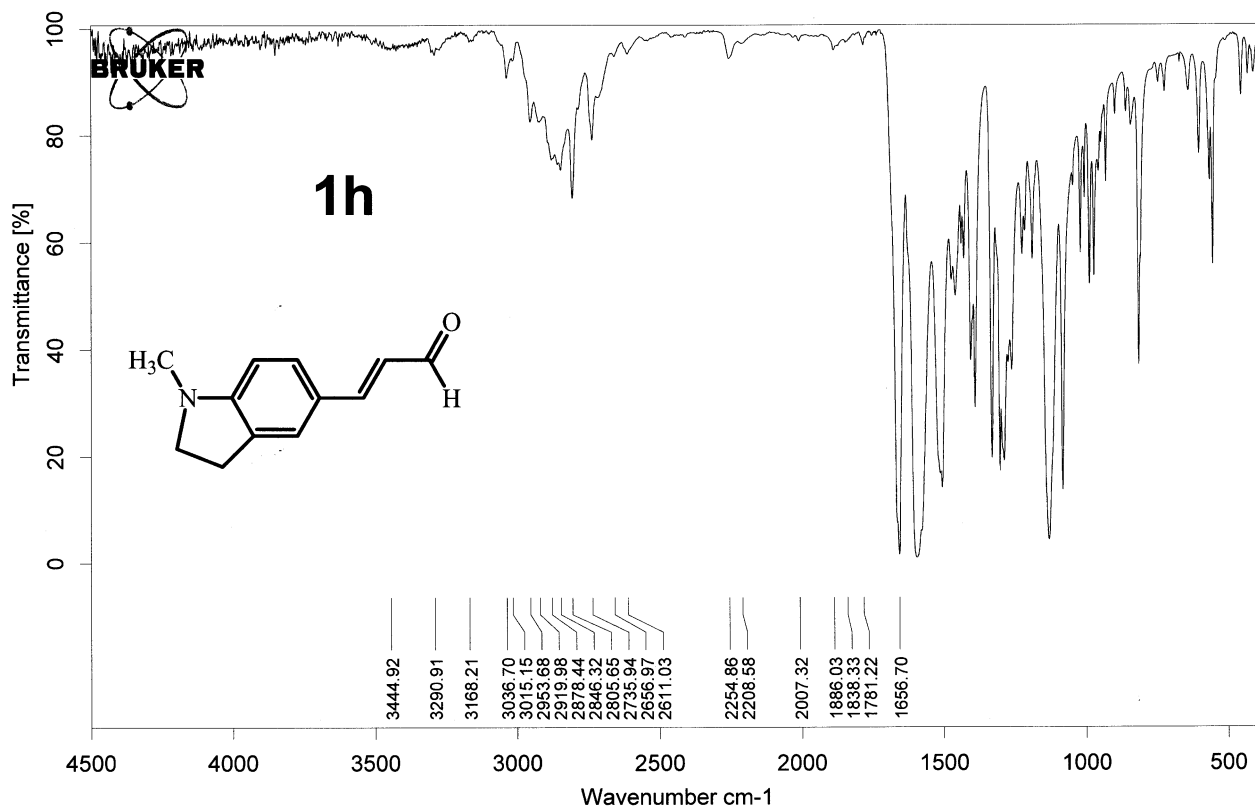

## Enlarged spectrum in the range of 1700 - 400 $\text{cm}^{-1}$ .

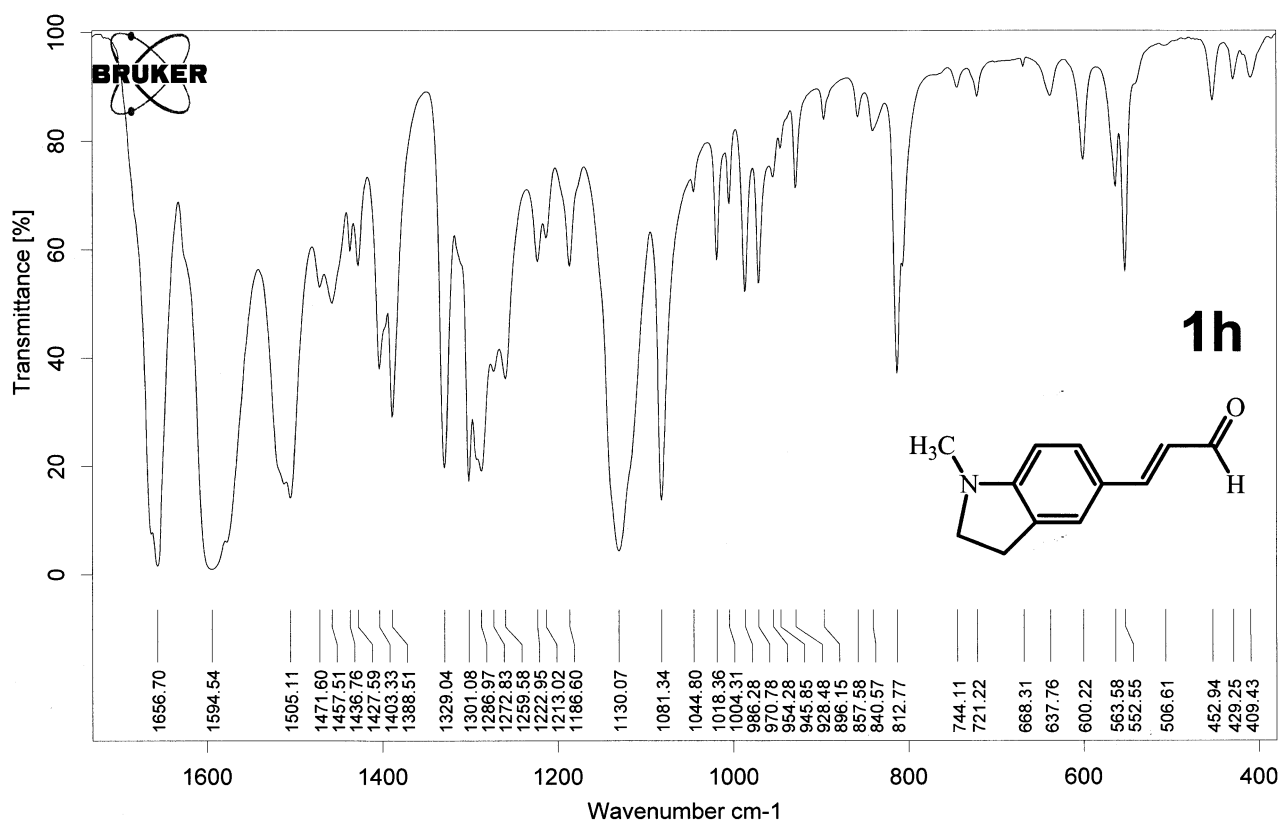

# IR spectrum of **1i**

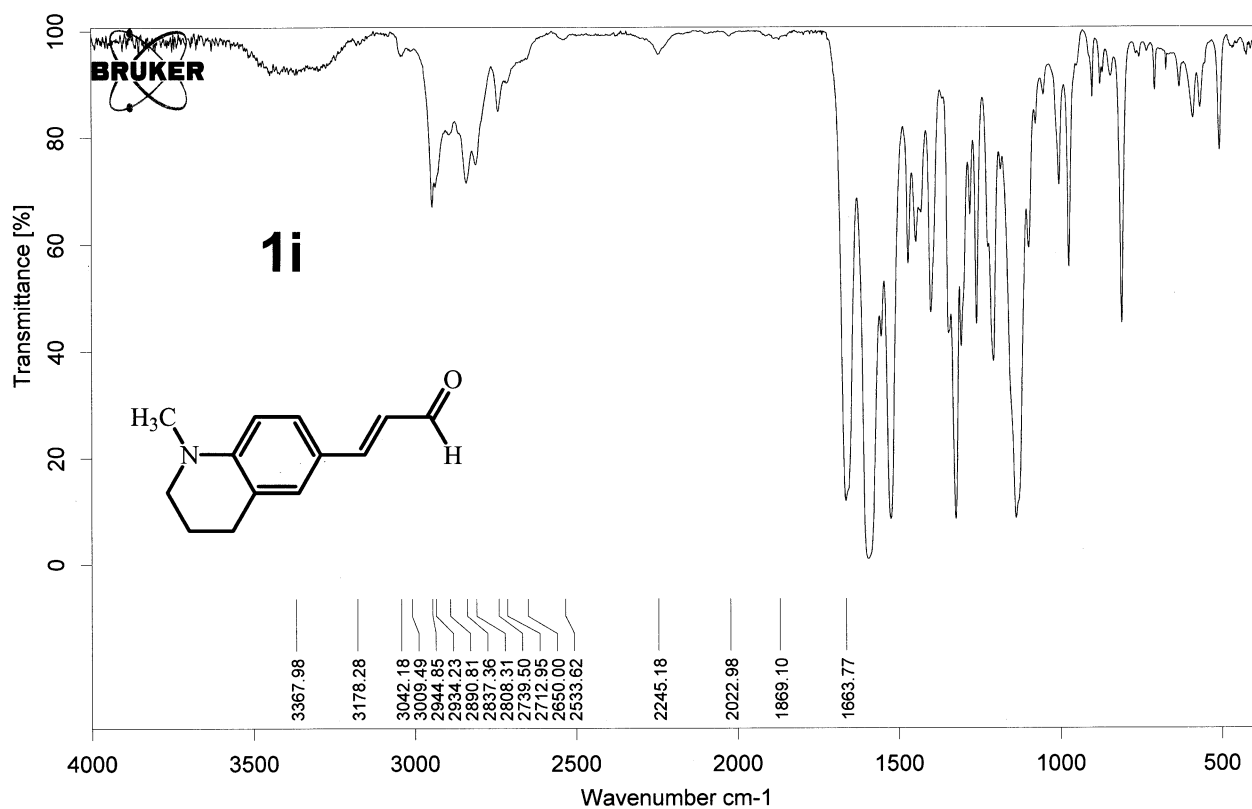

## Enlarged spectrum in the range of 1700 - 400 $\text{cm}^{-1}$ .

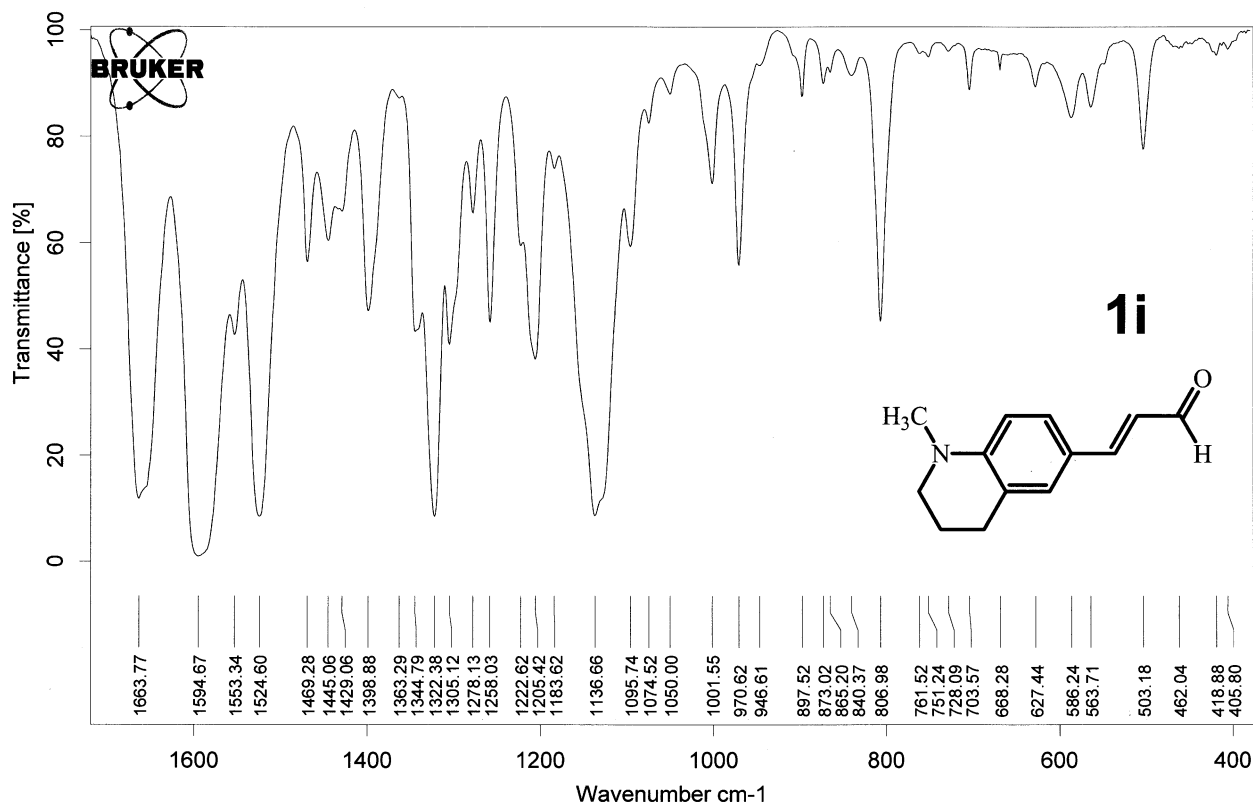

# IR spectrum of **1j**

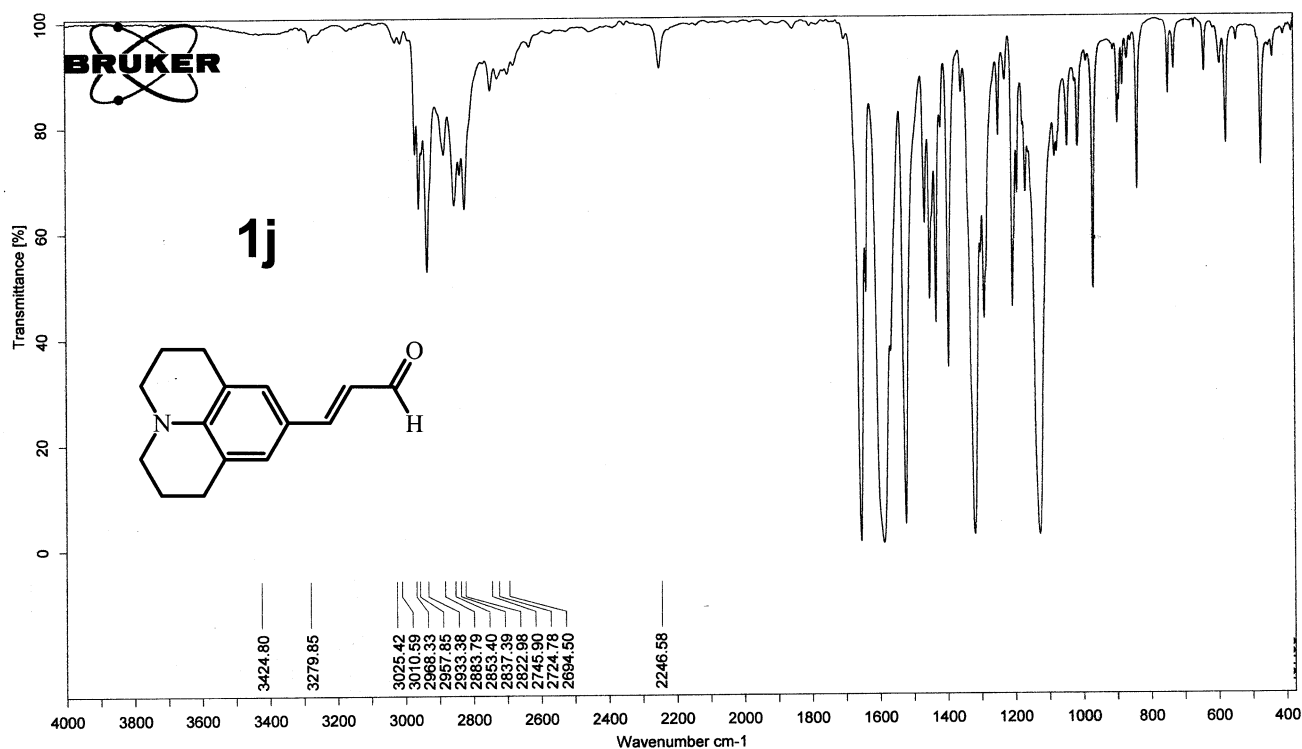

## Enlarged spectrum in the range of 1700 - 400 cm⁻¹.

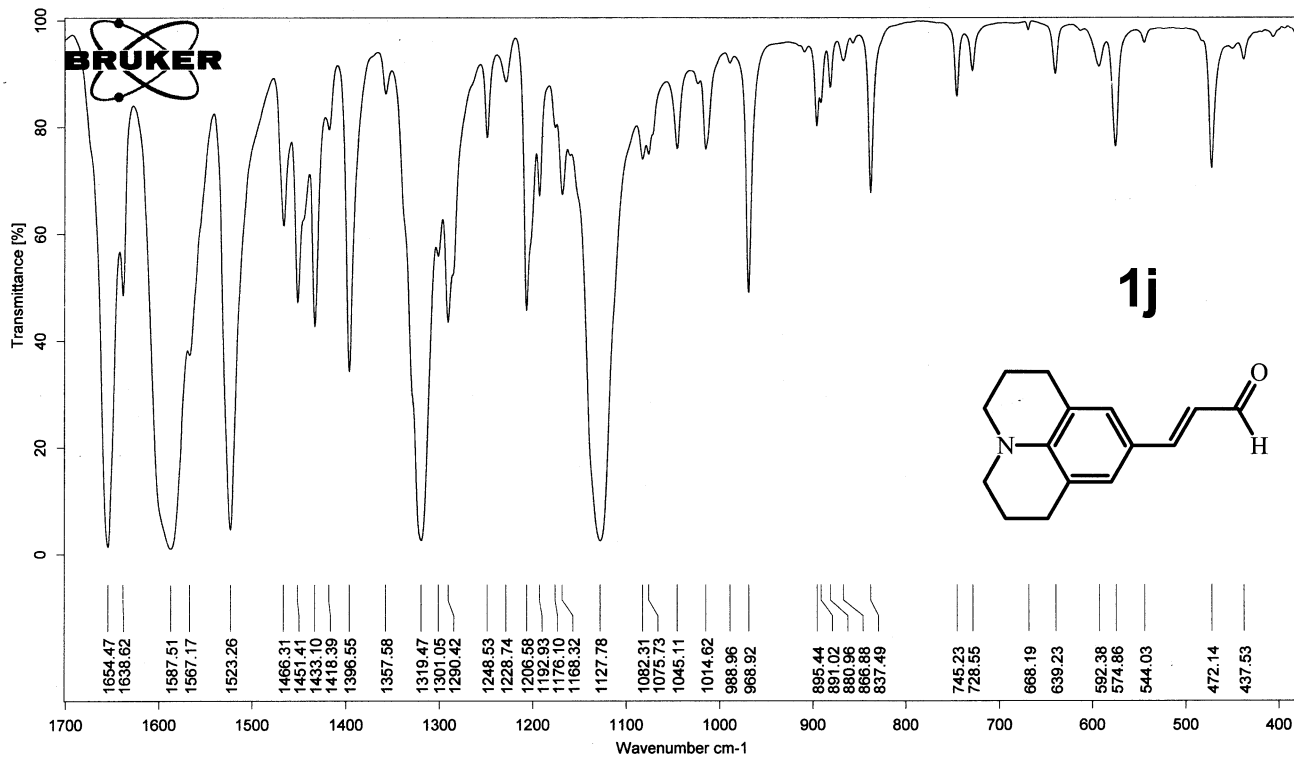

Supplement: s1 [file s1]
